# Supplementary material for: Construction of quaternary alkyl motifs through palladium-catalyzed oxidative coupling of 1,3-dicarbonyl compounds with alkenes followed by C–C bond cleavage
Source: Royal Society of Chemistry journal article supplement (doi:10.1039/d4cc03676j), 2024-01-01

# Construction of Quaternary Alkyl Motifs through Palladium-Catalyzed Oxidative Coupling of 1,3-Dicarbonyl Compounds with Alkenes Followed by C-C Bond Cleavage

## Table of Contents

|                                                                                                               |       |
|---------------------------------------------------------------------------------------------------------------|-------|
| General Methods and Materials.....                                                                            | 2     |
| General Procedure for Preparation of Compounds 2-Aryl-1,3-indandiones <b>1</b> .....                          | 3-5   |
| Screening of Reaction Conditions.....                                                                         | 6     |
| General Procedure for Palladium-Catalyzed Oxidative Coupling of 1,3-Dicarbonyl<br>Compounds with Alkenes..... | 7     |
| Control Experiments.....                                                                                      | 8-16  |
| References.....                                                                                               | 16    |
| Characterization data for the products.....                                                                   | 17-26 |
| Copies of <sup>1</sup> H and <sup>13</sup> C NMR spectra of products.....                                     | 27-55 |

## General Methods and Materials

Pd(OAc)<sub>2</sub>, Cu(OAc)<sub>2</sub>, Cu(OAc)<sub>2</sub>·H<sub>2</sub>O, CuBr, CuBr·SMe<sub>2</sub>, CuCl<sub>2</sub>, CuCl, CuI, Cu(acac)<sub>2</sub>, Cu(OTf)<sub>2</sub>, CuOTf, Cu(TFA)<sub>2</sub>, K<sub>2</sub>CO<sub>3</sub>, K<sub>3</sub>PO<sub>4</sub>, Cs<sub>2</sub>CO<sub>3</sub>, Na<sub>2</sub>CO<sub>3</sub>, NaOMe, NaO<sup>t</sup>Bu and LiO<sup>t</sup>Bu were purchased from Energy Chemical and used without further purification. Other chemicals were purchased from commercial suppliers, further dried and purified if necessary. The water used was re-distilled and ion-free. <sup>1</sup>H and <sup>13</sup>C NMR spectra were achieved on a Bruker AVANCE 400 MHz spectrometer (<sup>1</sup>H 400 MHz; <sup>13</sup>C 100 MHz) in CDCl<sub>3</sub>. Abbreviations for data quoted are *s*-singlet; *brs*-broad singlet; *d*-doublet; *t*-triplet; *dd*-doublet of doublets; *m*-multiplet. High-resolution mass spectra were measured on a Waters Micromass GCT facility. Thin-layer chromatographies were done on pre-coated silica gel 60F254 plates (Merck). Silica gel 60H (200-300 mesh) manufactured by Qingdao Haiyang Chemical Group Co. (China) was used for general chromatography.

## General Procedure for Preparation of Compounds

### 2-Aryl-1,3-indandiones 1.<sup>[1]</sup>

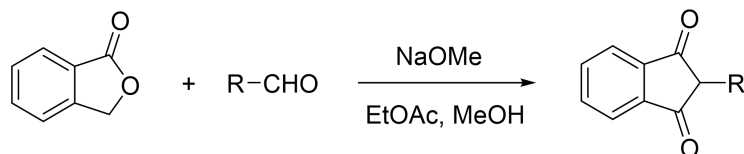

EtOAc (1.8 mL) was added to a suspension of the aldehyde (7.5 mmol, 1.0 equiv.) and the phthalide (7.5 mmol, 1.0 equiv.) in anhydrous MeOH (10 mL), followed by the addition of NaOMe (25% wt in MeOH, 4.0 mL) at room temperature. The mixture was heated under reflux for 3 h and then cooled to room temperature. After concentration *in vacuo*, water (5.0 mL) was added to the residue and the solution was acidified with conc. HCl to pH 1.0. The 2-substituted indanedione was collected by filtration and dried *in vacuo* to give a yellow powder, which was used for the next step without further purification.

### The Procedure for the Preparation of 2-Phenyl-1,3-indandione 1a

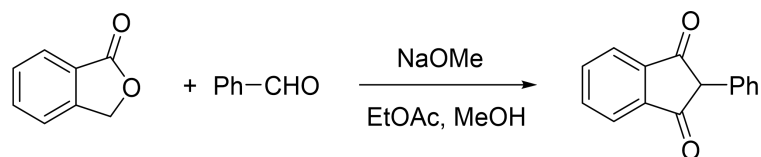

EtOAc (1.8 mL) was added to a suspension of the benzaldehyde (7.5 mmol, 795.0 mg, 1.0 equiv.) and the phthalide (7.5 mmol, 1005.0 mg, 1.0 equiv.) in anhydrous MeOH (10 mL), followed by the addition of NaOMe (25% wt in MeOH, 4.0 mL) at room temperature. The mixture was heated under reflux for 3 h and then cooled to room temperature. After concentration *in vacuo*, water (5.0 mL) was added to the residue and the solution was acidified with conc. HCl to pH 1.0. The 2-substituted indanedione was collected by filtration and dried *in vacuo* to give a yellow powder, which was used for the next step without further purification.

2-Phenyl-1H-indene-1,3(2H)-dione (**1a**)<sup>[1]</sup>: Obtained as a yellow solid (1581.8 mg, 95% yield); <sup>1</sup>H NMR (400 MHz, CDCl<sub>3</sub>) δ 8.09 - 8.06 (q, 2H), 7.92 - 7.90 (q, 2H), 7.38 - 7.31 (m, 3H), 7.20 - 7.18 (m, 2H), 4.27 (s, 1H); <sup>13</sup>C NMR (100 MHz, CDCl<sub>3</sub>) δ 198.3, 142.7, 136.0, 133.1, 129.0, 128.7, 127.9, 123.8, 59.8.

# <sup>1</sup>H NMR and <sup>13</sup>C NMR of 1a

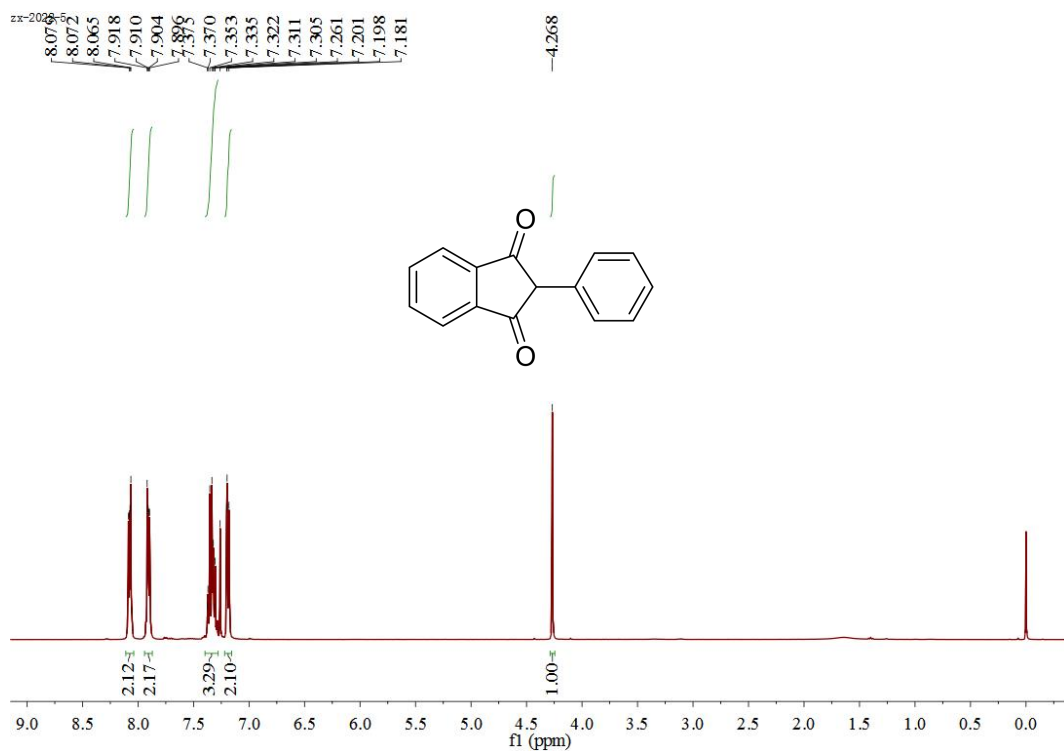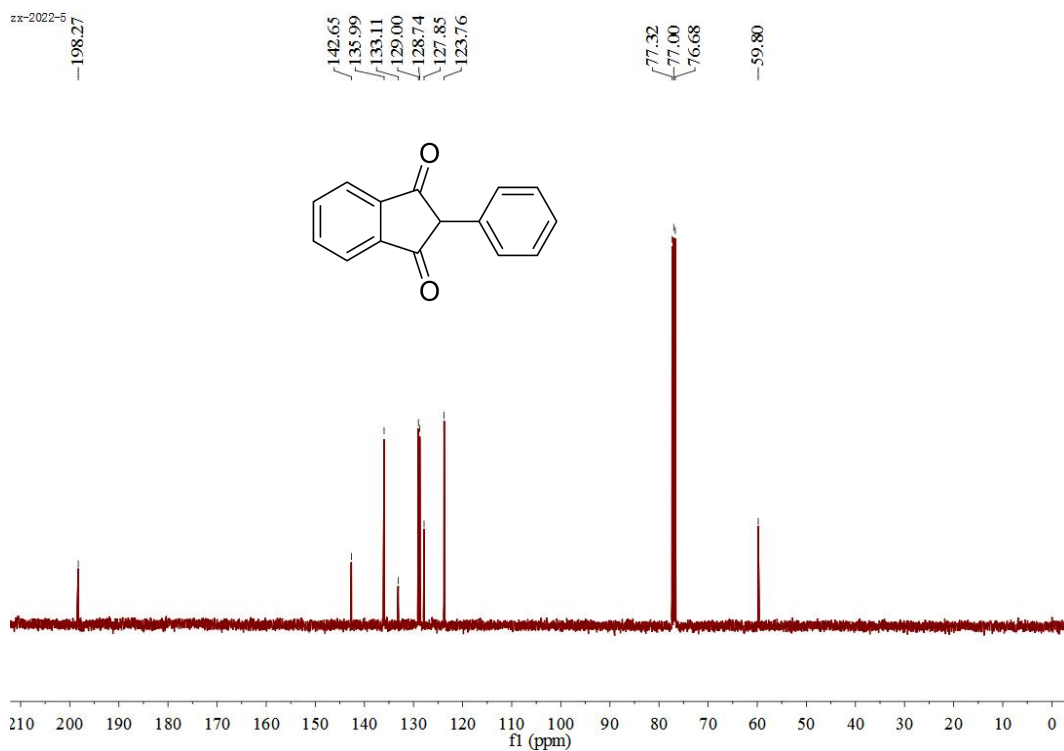

## Screening of Reaction Conditions

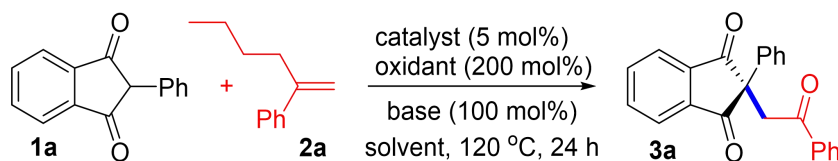

| entry | catalyst                           | oxidant                         | base                | solvent | yield (%) <sup>b</sup> |
|-------|------------------------------------|---------------------------------|---------------------|---------|------------------------|
| 1     | Pd(OAc) <sub>2</sub>               | BQ                              | NaO <sup>t</sup> Bu | toluene | trace                  |
| 2     | Pd(OAc) <sub>2</sub>               | H <sub>2</sub> O <sub>2</sub>   | NaO <sup>t</sup> Bu | toluene | 0                      |
| 3     | Pd(OAc) <sub>2</sub>               | TBHP                            | NaO <sup>t</sup> Bu | toluene | 0                      |
| 4     | Pd(OAc) <sub>2</sub>               | O <sub>2</sub>                  | NaO <sup>t</sup> Bu | toluene | trace                  |
| 5     | Pd(OAc) <sub>2</sub>               | Ag <sub>2</sub> CO <sub>3</sub> | NaO <sup>t</sup> Bu | toluene | trace                  |
| 6     | Pd(OAc) <sub>2</sub>               | AgOTf                           | NaO <sup>t</sup> Bu | toluene | 17                     |
| 7     | Pd(OAc) <sub>2</sub>               | AgNTf                           | NaO <sup>t</sup> Bu | toluene | 21                     |
| 8     | PdCl <sub>2</sub>                  | Cu(OAc) <sub>2</sub>            | NaO <sup>t</sup> Bu | toluene | 41                     |
| 9     | Pd <sub>2</sub> dba <sub>3</sub>   | Cu(OAc) <sub>2</sub>            | NaO <sup>t</sup> Bu | toluene | trace                  |
| 10    | Pd(PPh <sub>3</sub> ) <sub>4</sub> | Cu(OAc) <sub>2</sub>            | NaO <sup>t</sup> Bu | toluene | 0                      |
| 11    | Pd(acac) <sub>2</sub>              | Cu(OAc) <sub>2</sub>            | NaO <sup>t</sup> Bu | toluene | 28                     |
| 12    | Pd(TFA) <sub>2</sub>               | Cu(OAc) <sub>2</sub>            | NaO <sup>t</sup> Bu | toluene | 56                     |

Failed 1,3-dicarbonyl compounds

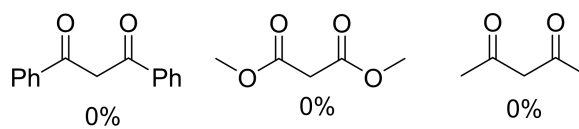

Failed olefins

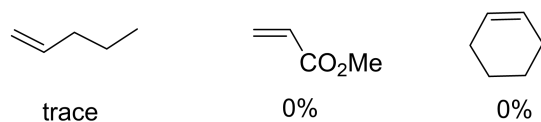

## General Procedure for Palladium-Catalyzed Oxidative Coupling of 1,3-Dicarbonyl Compounds with Alkenes

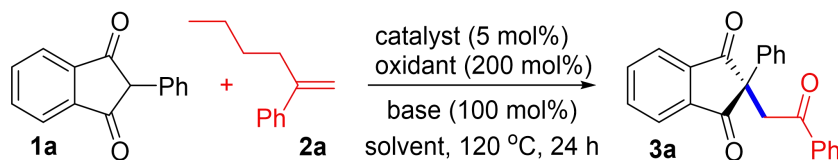

To a dry thick walled pressure resistant tube (25 mL) was charged with 2-phenyl-1,3-indandione **1a** (0.2 mmol),  $\alpha$ -*n*-butylstyrene **2a** (0.3 mmol, 1.5 equiv), Pd(OAc)<sub>2</sub> (2.3 mg, 5.0 mol%), Cu(OAc)<sub>2</sub> (0.4 mmol, 72.4 mg, 2.0 equiv), toluene (2 mL), then the NaO<sup>t</sup>Bu (0.2 mmol) was added. The tube was closed with a PTFE thread sealing cap. The mixture was stirred at 120 °C in oil bath for 24 hours under an atmosphere of air. After the reaction finished, the resulted mixtures were diluted with 20 mL of dichloromethane and washed with 20 mL of H<sub>2</sub>O. The aqueous layer was extracted twice with dichloromethane (10 mL) and the combined organic phase was dried over Na<sub>2</sub>SO<sub>4</sub>. After evaporation of the solvents, the residue was purified by silica gel chromatography (hexane/AcOEt = 20 : 1) to yield product.

## Control Experiments

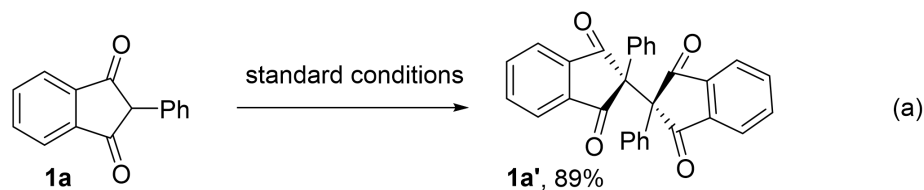

A reaction flask (25 mL) was charged with 2-phenyl-1,3-indandione **1a** (0.2 mmol, 1.0 equiv), Pd(OAc)<sub>2</sub> (2.3 mg, 5.0 mol%), Cu(OAc)<sub>2</sub> (0.4 mmol, 72.4 mg, 2.0 equiv), toluene (2 mL), then the NaO<sup>t</sup>Bu (0.2 mmol) was added. The mixture was stirred at 120 °C for 8 hours under an atmosphere of air. After the reaction finished, the resulted mixtures were diluted with 20 mL of dichloromethane and washed with 20 mL of H<sub>2</sub>O. The aqueous layer was extracted twice with dichloromethane (10 mL) and the combined organic phase was dried over Na<sub>2</sub>SO<sub>4</sub>. After evaporation of the solvents, the residue was purified by silica gel chromatography (hexane/AcOEt = 3 : 1) to yield product **1a'** 78.7 mg.

2,2'-Diphenyl-1H,1'H-[2,2'-biindene]-1,1',3,3'(2H,2'H)-tetraone (**1a'**): Obtained as a pale yellow solid (84.0 mg, 76% yield), eluting with 20% EtOAc in PE (elution gradient); <sup>1</sup>H NMR (400 MHz, CDCl<sub>3</sub>) δ ppm: 7.86 - 7.89 (m, 4H), 7.71 - 7.73 (m, 4H), 7.32 - 7.35 (t, *J* = 6.8 Hz, 2H), 7.23 - 7.27 (t, *J* = 8.0 Hz, 4H), 7.18 - 7.20 (d, *J* = 8.0 Hz, 4H); <sup>13</sup>C NMR (100 MHz, CDCl<sub>3</sub>) δ ppm: 197.4, 140.90, 135.6, 130.4, 129.8, 128.7, 127.5, 123.7, 64.3; HRMS (ESI-TOF) *m/z* calcd for C<sub>30</sub>H<sub>19</sub>O<sub>4</sub> [M + H]<sup>+</sup> 443.1278, found 443.1275.



21-308  
7.878  
7.872  
7.864  
7.730  
7.722  
7.731  
7.734  
7.716  
7.272  
7.252  
7.234  
7.202  
7.182

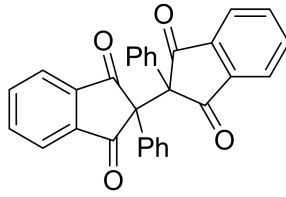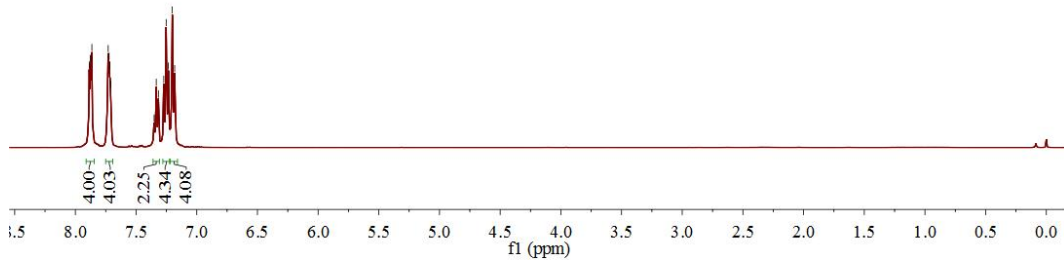

21-302

-197.40

140.87  
135.61  
130.39  
129.81  
128.65  
127.51  
123.70

77.32  
77.00  
76.68  
64.33

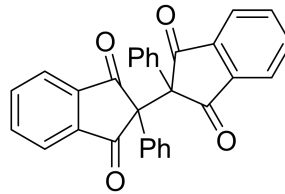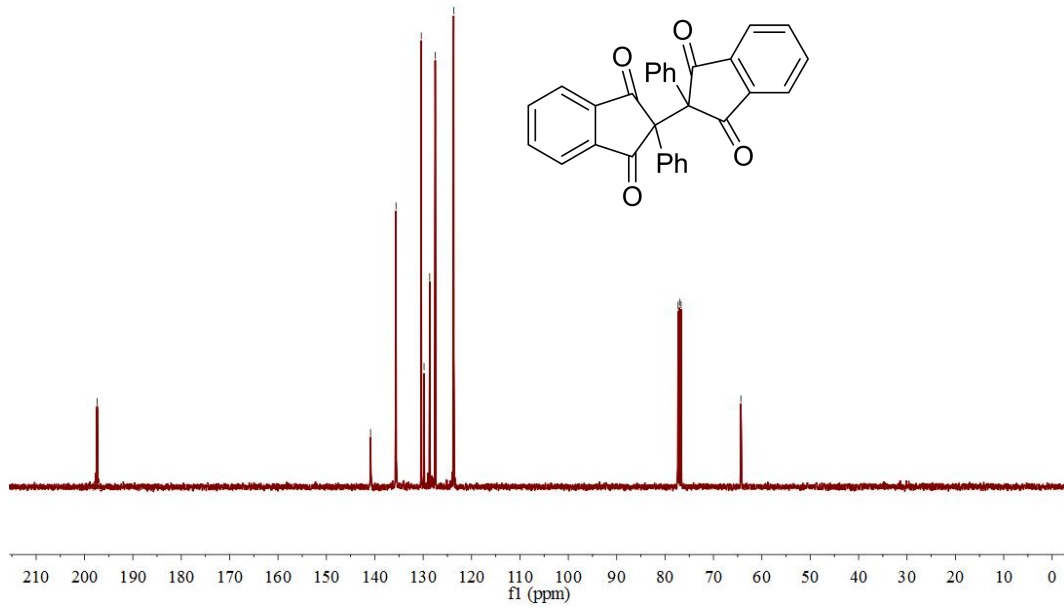

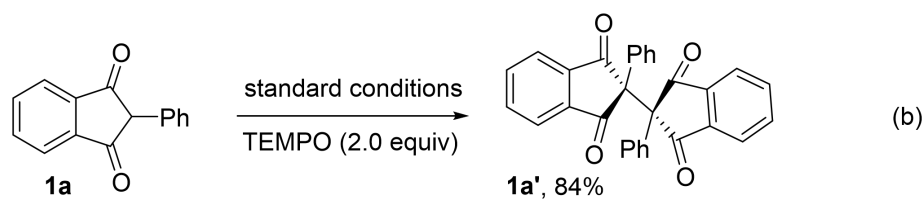

A reaction flask (25 mL) was charged with 2-phenyl-1,3-indandione **1a** (0.2 mmol, 1.0 equiv), Pd(OAc)<sub>2</sub> (2.3 mg, 5.0 mol%), Cu(OAc)<sub>2</sub> (0.4 mmol, 72.4 mg, 2.0 equiv), TEMPO (0.4 mmol, 2.0 equiv), toluene (2 mL), then the NaO<sup>t</sup>Bu (0.2 mmol) was added. The mixture was stirred at 120 °C for 8 hours under an atmosphere of air. After the reaction finished, the resulted mixtures were diluted with 20 mL of dichloromethane and washed with 20 mL of H<sub>2</sub>O. The aqueous layer was extracted twice with dichloromethane (10 mL) and the combined organic phase was dried over Na<sub>2</sub>SO<sub>4</sub>. After evaporation of the solvents, the residue was purified by silica gel chromatography (hexane/AcOEt = 3 : 1) to yield product.

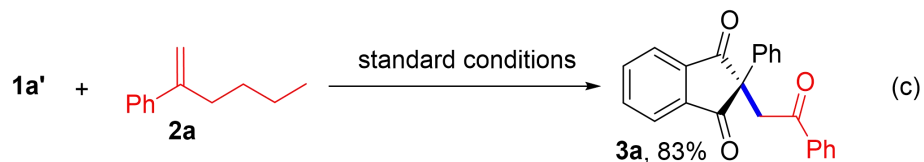

A reaction flask (25 mL) was charged with **1a'** (0.2 mmol, 1.0 equiv), *α*-*n*-butylstyrene **2a** (0.3 mmol, 1.5 equiv), Pd(OAc)<sub>2</sub> (2.3 mg, 5.0 mol%), Cu(OAc)<sub>2</sub> (0.4 mmol, 72.4 mg, 2.0 equiv), toluene (2 mL), then the NaO<sup>t</sup>Bu (0.2 mmol) was added. The tube was closed with a PTFE thread sealing cap. The mixture was stirred at 120 °C in oil bath for 24 hours under an atmosphere of air. After the reaction finished, the resulted mixtures were diluted with 20 mL of dichloromethane and washed with 20 mL of H<sub>2</sub>O. The aqueous layer was extracted twice with dichloromethane (10 mL) and the combined organic phase was dried over Na<sub>2</sub>SO<sub>4</sub>. After evaporation of the solvents, the residue was purified by silica gel chromatography (hexane/AcOEt = 20 : 1) to yield product **3a**.

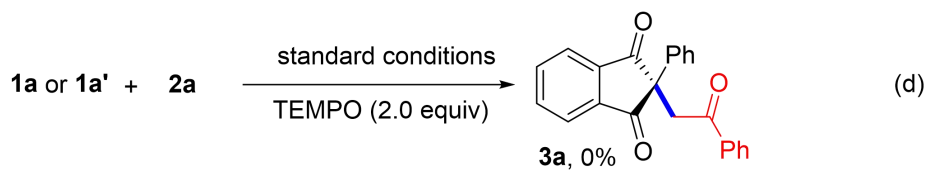

A reaction flask (25 mL) was charged with  $\mathbf{1a'}$  (0.2 mmol, 1.0 equiv), or 2-phenyl-1,3-indandione  $\mathbf{1a}$  (0.2 mmol, 1.0 equiv),  $\alpha$ -*n*-butylstyrene  $\mathbf{2a}$  (0.3 mmol, 1.5 equiv), Pd(OAc)<sub>2</sub> (2.3 mg, 5.0 mol%), Cu(OAc)<sub>2</sub> (0.4 mmol, 72.4 mg, 2.0 equiv), TEMPO (0.4 mmol, 2.0 equiv), toluene (2 mL), then the NaO<sup>t</sup>Bu (0.2 mmol) was added. The mixture was stirred at 120 °C for 8 hours under an atmosphere of air. After the reaction finished, no desired product of  $\mathbf{3a}$  was detected.

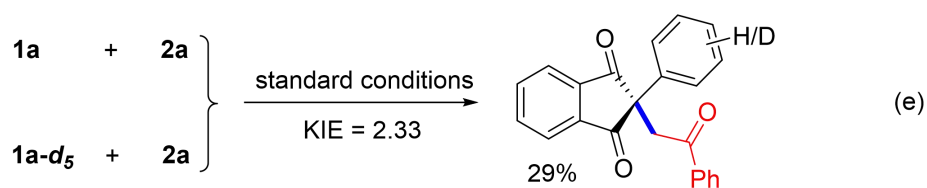

A reaction flask (25 mL) was charged with 2-phenyl-1,3-indandione **1a** (0.1 mmol, 22.2 mg, 1.0 equiv), 2-phenyl-*d*<sub>5</sub>-1,3-indandione **1a-*d*<sub>5</sub>** (0.1 mmol, 22.7 mg, 1.0 equiv), *α*-*n*-butylstyrene **2a** (0.3 mmol, 1.5 equiv), Pd(OAc)<sub>2</sub> (2.3 mg, 5.0 mol%), Cu(OAc)<sub>2</sub> (0.4 mmol, 72.4 mg, 2.0 equiv), toluene (2 mL), then the NaO<sup>t</sup>Bu (0.2 mmol) was added. The mixture was stirred at 120 °C in the oil bath for 20 minutes under an atmosphere of air. After the reaction finished, take one tenth of the resulted mixtures for treatment, the resulted mixtures were diluted with 20 mL of dichloromethane and washed with 20 mL of H<sub>2</sub>O. The aqueous layer was extracted twice with dichloromethane (10 mL) and the combined organic phase was dried over Na<sub>2</sub>SO<sub>4</sub>. After evaporation of the solvents, the residue was purified by silica gel chromatography (hexane/AcOEt = 20 : 1) to yield product.

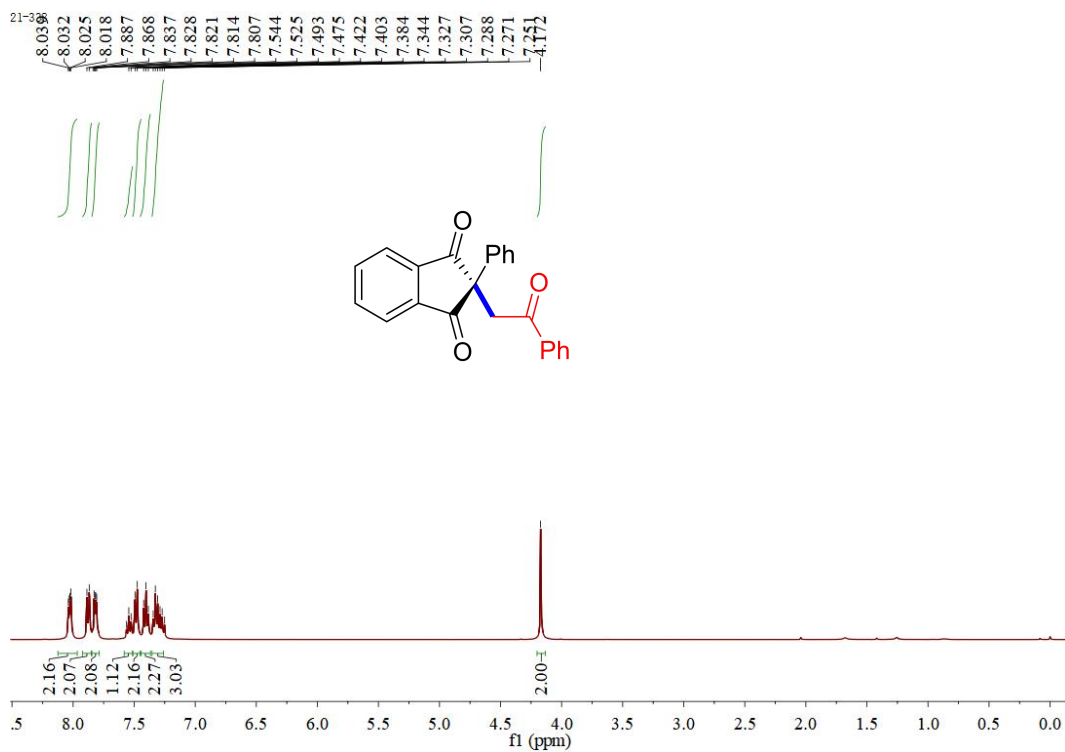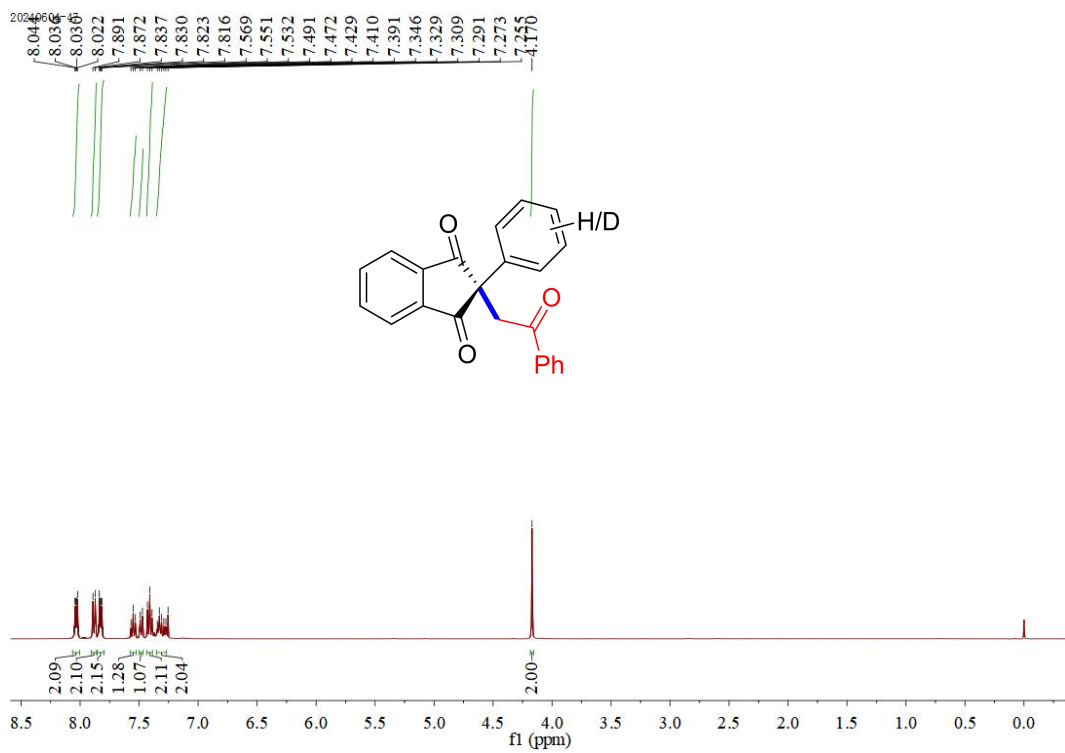

$$\text{KIE} = 1.07 + 2.11 + 2.04 / 2.16 + 2.27 + 3.03 - 1.07 - 2.11 - 2.04 = 5.22 / 2.24 = 2.33$$

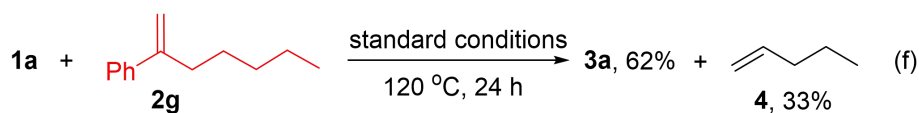

To a dry thick walled pressure resistant tube (25 mL) was charged with 2-phenyl-1,3-indandione **1a** (0.2 mmol), *n*-butylstyrene **2a** (0.3 mmol, 1.5 equiv), Pd(OAc)<sub>2</sub> (2.3 mg, 5.0 mol%), Cu(OAc)<sub>2</sub> (0.4 mmol, 72.4 mg, 2.0 equiv), toluene (2 mL), then the NaO<sup>t</sup>Bu (0.2 mmol) was added. The tube was closed with a PTFE thread sealing cap. The mixture was stirred at 120 °C in oil bath for 24 hours under an atmosphere of air. After the reaction finished, the resulted mixtures were diluted with 20 mL of dichloromethane and washed with 20 mL of H<sub>2</sub>O. The aqueous layer was extracted twice with dichloromethane (10 mL) and the combined organic phase was dried over Na<sub>2</sub>SO<sub>4</sub>. After evaporation of the solvents, the residue was purified by silica gel chromatography (hexane/AcOEt = 100 : 1 ~ 20 : 1) to yield product.

**pent-1-ene:** Obtained as a pale liquid (36.5 mg, 33% yield), eluting with 5% EtOAc in PE (elution gradient); <sup>1</sup>H NMR (400 MHz, CDCl<sub>3</sub>) δ 5.77 - 5.87 (m, 1H), 4.93 - 5.02 (m, 2H), 2.00 - 2.06 (m, 2H), 1.57 (s, 1H), 1.37 - 1.46 (m, 2H), 0.89 - 0.93 (t, 3H); <sup>13</sup>C NMR (101 MHz, CDCl<sub>3</sub>) δ 139.0, 114.3, 35.9, 22.1, 13.6.

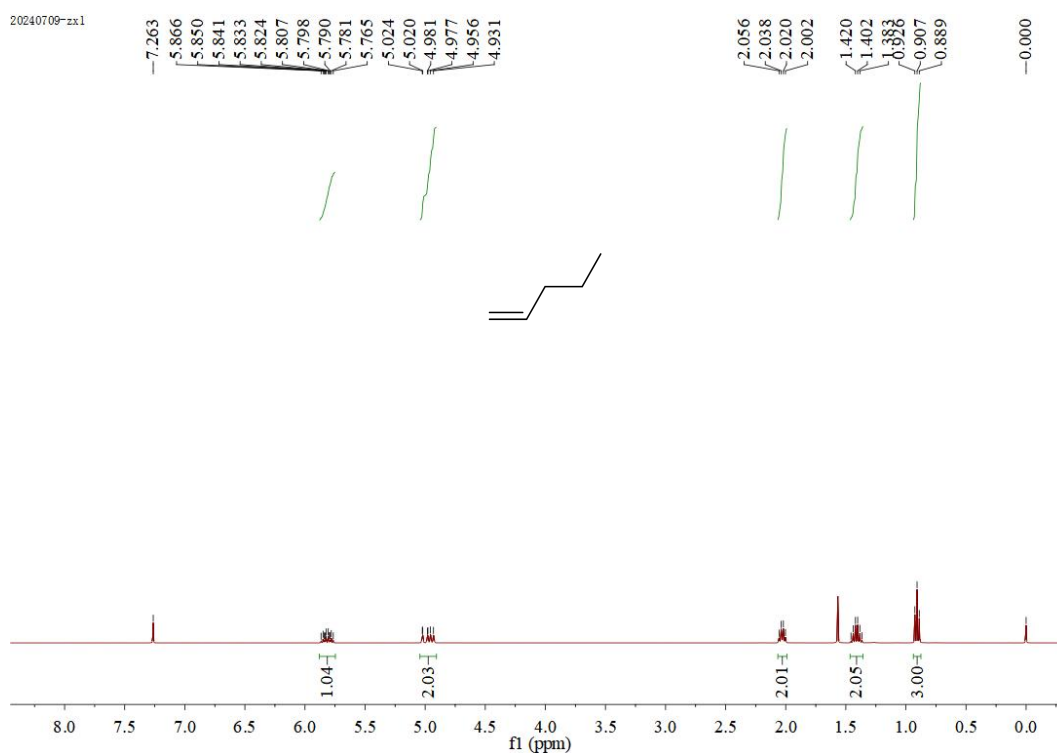

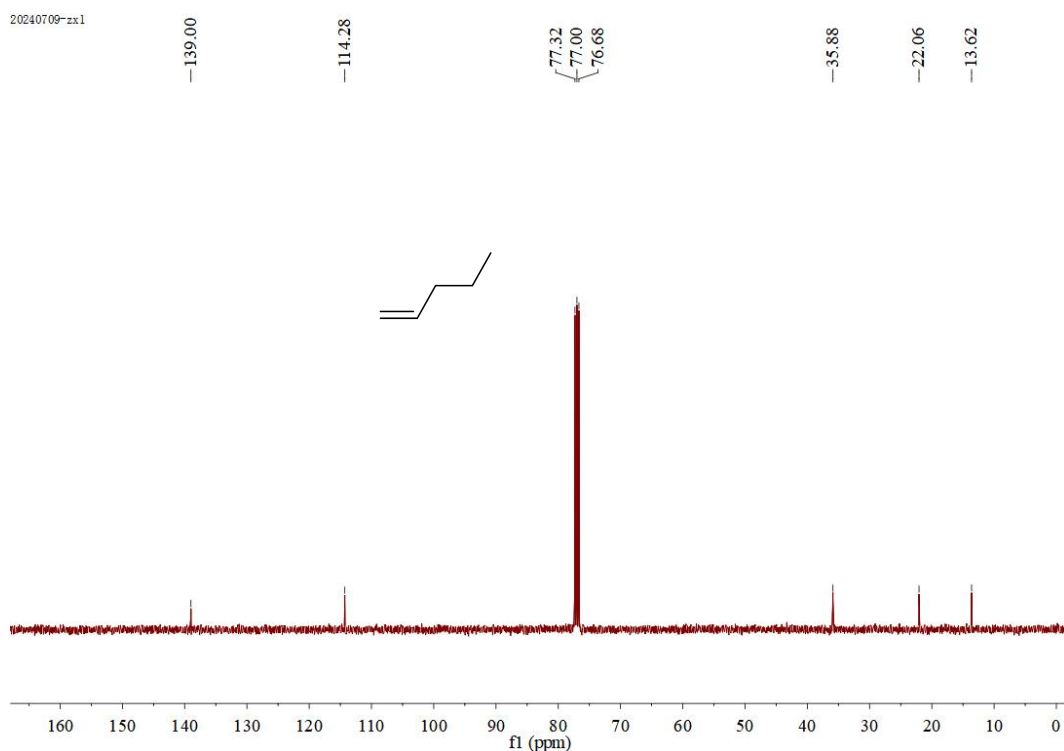

## References:

- [1] (a) Inoue, K.; Urushibara, K.; Kanai, M.; Yura, K.; Fujii, S.; Ishigami, Y. M.; Hashimoto, M.; Mori, S.; Kawachi, E.; Matsumura, M.; Hirano, T.; Kagechika, H.; Tanatani, A. *Eur. J. Med. Chem.* **2015**, *102*, 310 - 319. (b) Cai, L.; Zhang, K.; Chen, S.; Lepage, R. J.; Houk, K. N.; Krenske, E. H.; Kwon, O. *J. Am. Chem. Soc.* **2019**, *141*, 9537 - 9542. (c) Zhang, X.; Wang, D.; Chang, M.; Wang, W.; Shen, Z.; Xu, X. *Chem Comm.* **2023**, *59*, 12326 - 12329. (d) Shi, Y.; Wang, D.; Sun, R.; Chen, X.; Xu, X.; Xie, H.; Zhang, X. *Adv. Synth. Catal.* **2023**, *365*, 741-746.



## Characterization data for the products

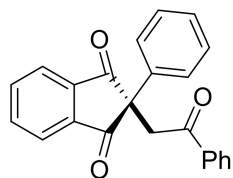

2-(2-Oxo-2-phenylethyl)-2-phenyl-1H-indene-1,3(2H)-dione (**3a**).

Obtained as a yellow liquid (57.1 mg, 84% yield), eluting with 10% EtOAc in PE (elution gradient);  $^1\text{H NMR}$  (400 MHz,  $\text{CDCl}_3$ )  $\delta$  ppm: 8.02 - 8.04 (q, 2H), 7.88 (d,  $J = 7.6$  Hz, 2H), 7.81 - 7.84 (q, 2H), 7.53 - 7.56 (t, 1H), 7.48 (d,  $J = 7.2$  Hz, 2H), 7.38 - 7.42 (t, 2H), 7.25 - 7.35 (m, 3H), 4.17 (s, 2H);  $^{13}\text{C NMR}$  (100 MHz,  $\text{CDCl}_3$ )  $\delta$  ppm: 200.0, 196.7, 141.7, 135.3, 135.2, 135.0, 133.7, 129.1, 128.6, 128.3, 128.1, 126.9, 123.5, 59.6, 47.3. **HRMS** (ESI-TOF)  $m/z$  calcd for  $\text{C}_{23}\text{H}_{17}\text{O}_3$   $[\text{M} + \text{H}]^+$  341.1172, found 341.1172.

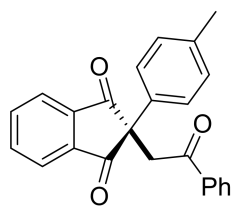

2-(2-Oxo-2-phenylethyl)-2-(*p*-tolyl)-1H-indene-1,3(2H)-dione (**3b**).

Obtained as a yellow liquid (61.6 mg, 87% yield), eluting with 10% EtOAc in PE (elution gradient);  $^1\text{H NMR}$  (400 MHz,  $\text{CDCl}_3$ )  $\delta$  ppm: 8.02 - 8.04 (q, 2H), 7.81 - 7.83 (q, 2H), 7.77 (d,  $J = 8.0$  Hz, 2H), 7.48 (d,  $J = 7.2$  Hz, 2H), 7.26 - 7.34 (m, 3H), 7.20 (d,  $J = 8.0$  Hz, 2H), 4.15 (s, 2H), 2.38 (s, 3H);  $^{13}\text{C NMR}$  (100 MHz,  $\text{CDCl}_3$ )  $\delta$  ppm: 200.1, 196.3, 144.7, 141.8, 135.4, 135.2, 132.7, 129.3, 129.1, 128.4, 128.0, 127.0, 123.5, 59.7, 47.3, 21.7. **HRMS** (ESI-TOF)  $m/z$  calcd for  $\text{C}_{24}\text{H}_{19}\text{O}_3$   $[\text{M} + \text{H}]^+$  355.1329, found 355.1332.

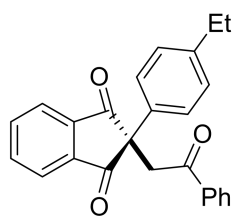

2-(4-Ethylphenyl)-2-(2-oxo-2-phenylethyl)-1H-indene-1,3(2H)-dione (**3c**).

Obtained as a yellow liquid (63.3 mg, 86% yield), eluting with 10% EtOAc in PE (elution gradient);  $^1\text{H NMR}$  (400 MHz,  $\text{CDCl}_3$ )  $\delta$  ppm: 8.01 - 8.03 (q, 2H), 7.87 (d,

$J = 8.0$  Hz, 2H), 7.80 - 7.82 (m, 2H), 7.52 - 7.56 (t, 1H), 7.38 - 7.42 (t, 4H), 7.16 (d,  $J = 8.0$  Hz, 2H), 4.15 (s, 2H), 2.56 - 2.61 (q, 2H), 1.16 - 1.20 (t, 3H);  $^{13}\text{C}$  NMR (100 MHz,  $\text{CDCl}_3$ )  $\delta$  ppm: 200.2, 196.7, 144.2, 141.7, 135.2, 135.0, 133.7, 132.4, 128.7, 128.6, 128.3, 126.8, 123.5, 59.4, 47.3, 28.3, 15.3; HRMS (ESI-TOF)  $m/z$  calcd for  $\text{C}_{25}\text{H}_{21}\text{O}_3$   $[\text{M} + \text{H}]^+$  369.1485, found 369.1482.

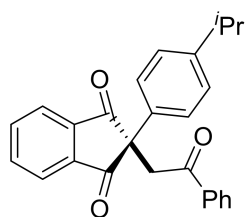

2-(4-Isopropylphenyl)-2-(2-oxo-2-phenylethyl)-1H-indene-1,3(2H)-dione (**3d**). Obtained as a yellow solid (67.2 mg, 88% yield), eluting with 10% EtOAc in PE (elution gradient);  $^1\text{H}$  NMR (400 MHz,  $\text{CDCl}_3$ )  $\delta$  ppm: 8.01 - 8.04 (q, 2H), 7.88 (d,  $J = 7.6$  Hz, 2H), 7.80 - 7.83 (m, 2H), 7.53 - 7.56 (t, 1H), 7.38 - 7.42 (m, 4H), 7.18 (d,  $J = 8.0$  Hz, 2H), 4.15 (s, 2H), 2.81 - 2.88 (m, 1H), 1.20 (s, 3H), 1.19 (s, 3H);  $^{13}\text{C}$  NMR (100 MHz,  $\text{CDCl}_3$ )  $\delta$  200.2, 196.8, 148.8, 141.8, 135.2, 133.7, 132.6, 128.6, 128.3, 127.2, 126.9, 123.5, 59.4, 47.3, 33.6, 23.8; HRMS (ESI-TOF)  $m/z$  calcd for  $\text{C}_{26}\text{H}_{23}\text{O}_3$   $[\text{M} + \text{H}]^+$  383.1642, found 383.1644.

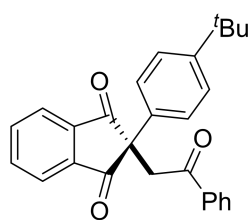

2-(4-(Tert-butyl)phenyl)-2-(2-oxo-2-phenylethyl)-1H-indene-1,3(2H)-dione (**3e**). Obtained as a yellow solid (71.3 mg, 90% yield), eluting with 10% EtOAc in PE (elution gradient);  $^1\text{H}$  NMR (400 MHz,  $\text{CDCl}_3$ )  $\delta$  ppm: 8.01 - 8.03 (q, 2H), 7.87 (d,  $J = 7.2$  Hz, 2H), 7.79 - 7.81 (m, 2H), 7.51 - 7.55 (t, 1H), 7.37 - 7.41 (m, 4H), 7.33 (d,  $J = 8.4$  Hz, 2H), 4.15 (s, 2H), 1.26 (s, 9H);  $^{13}\text{C}$  NMR (100 MHz,  $\text{CDCl}_3$ )  $\delta$  ppm: 200.1, 196.7, 151.0, 141.8, 135.2, 133.7, 132.2, 128.6, 128.3, 126.6, 126.1, 123.5, 59.4, 47.2, 34.4, 31.1; HRMS (ESI-TOF)  $m/z$  calcd for  $\text{C}_{27}\text{H}_{25}\text{O}_3$   $[\text{M} + \text{H}]^+$  397.1798, found 397.1795.

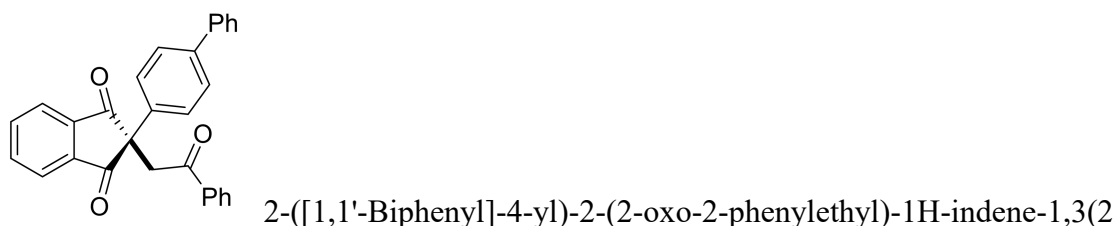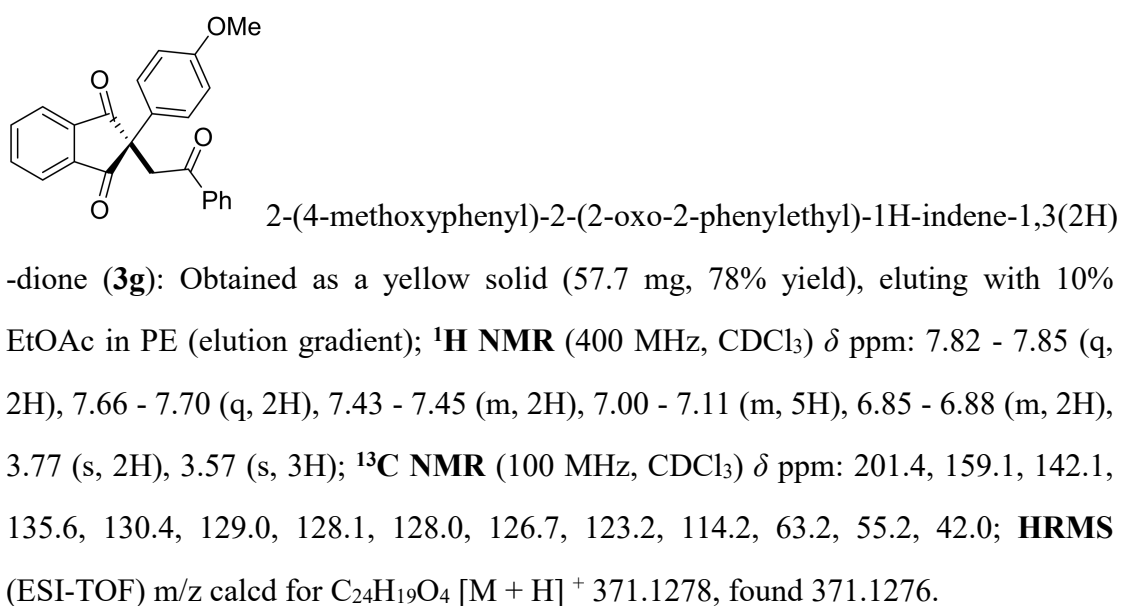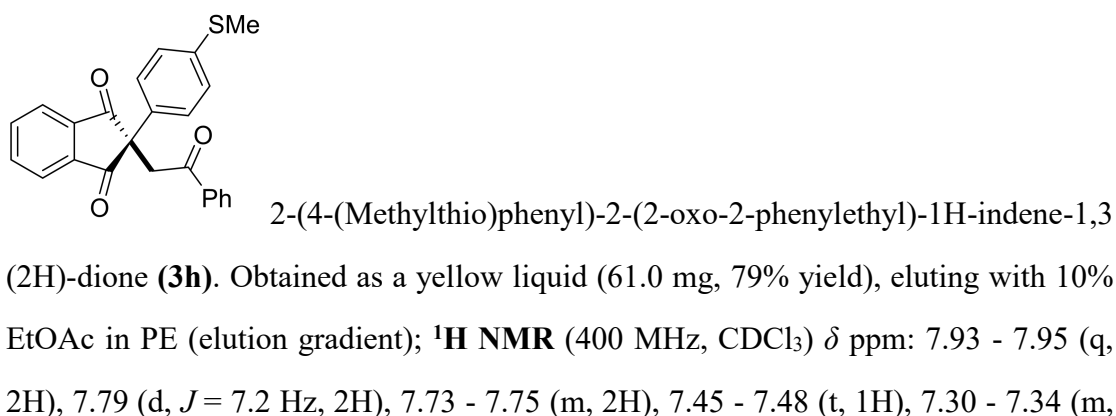

4H), 7.11 (d,  $J = 8.0$  Hz, 2H), 4.05 (s, 2H), 2.34 (s, 3H);  $^{13}\text{C}$  NMR (100 MHz,  $\text{CDCl}_3$ )  $\delta$  ppm: 199.9, 196.6, 141.7, 139.0, 135.3, 135.0, 133.7, 131.8, 128.6, 128.3, 127.3, 126.9, 123.5, 59.2, 47.2, 15.5; HRMS (ESI-TOF)  $m/z$  calcd for  $\text{C}_{24}\text{H}_{19}\text{O}_3\text{S}$   $[\text{M} + \text{H}]^+$  387.1049, found 387.1046.

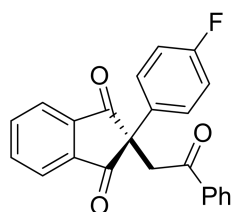

2-(4-Fluorophenyl)-2-(2-oxo-2-phenylethyl)-1H-indene-1,3(2H)-dione (**3i**). Obtained as a yellow liquid (51.6 mg, 72% yield), eluting with 10% EtOAc in PE (elution gradient);  $^1\text{H}$  NMR (400 MHz,  $\text{CDCl}_3$ )  $\delta$  ppm: 8.01 - 8.04 (m, 2H), 7.81 - 7.88 (m, 4H), 7.52 - 7.56 (t, 1H), 7.45 - 7.49 (m, 2H), 7.38 - 7.42 (m, 2H), 6.99 - 7.03 (m, 2H), 4.14 (s, 2H);  $^{13}\text{C}$  NMR (100 MHz,  $\text{CDCl}_3$ )  $\delta$  ppm: 200.0, 196.5, 162.4 (d,  $J = 246.7$  Hz), 141.5, 135.4, 134.8, 133.8, 130.8 (d,  $J = 3.2$  Hz), 128.7 (d,  $J = 8.2$  Hz), 128.6, 128.3, 123.5, 116.0 (d,  $J = 21.3$  Hz), 58.8, 47.4;  $^{19}\text{F}$  NMR (400 MHz,  $\text{CDCl}_3$ )  $\delta$  -116.1; HRMS (ESI-TOF)  $m/z$  calcd for  $\text{C}_{23}\text{H}_{16}\text{FO}_3$   $[\text{M} + \text{H}]^+$  359.1078, found 359.1075.

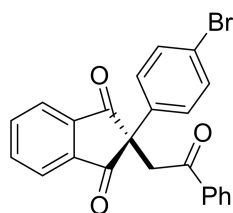

2-(4-Bromophenyl)-2-(2-oxo-2-phenylethyl)-1H-indene-1,3(2H)-dione (**3j**). Obtained as a yellow solid (61.9 mg, 74% yield), eluting with 10% EtOAc in PE (elution gradient);  $^1\text{H}$  NMR (400 MHz,  $\text{CDCl}_3$ )  $\delta$  ppm: 8.03 - 8.05 (q, 2H), 7.84 - 7.88 (m, 4H), 7.66 (s, 1H), 7.54 - 7.58 (t, 1H), 7.41 - 7.43 (m, 4H), 7.17 - 7.21 (t, 1H), 4.13 (s, 2H);  $^{13}\text{C}$  NMR (100 MHz,  $\text{CDCl}_3$ )  $\delta$  ppm: 200.0, 196.7, 141.7, 135.3, 135.0, 133.8, 133.2, 132.6, 132.4, 129.0, 128.6, 128.3, 128.1, 127.5, 126.6, 126.5, 126.3, 124.2, 123.6, 59.8, 47.3. HRMS (ESI-TOF)  $m/z$  calcd for  $\text{C}_{23}\text{H}_{16}\text{O}_3\text{Br}$   $[\text{M} + \text{H}]^+$  419.0277, found 419.0279.

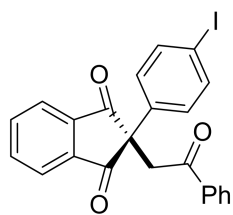

2-(4-Iodophenyl)-2-(2-oxo-2-phenylethyl)-1H-indene-1,3(2H)-dione (**3k**): Obtained as a yellow liquid (72.7 mg, 78% yield), eluting with 10% EtOAc in PE (elution gradient); **<sup>1</sup>H NMR** (400 MHz, CDCl<sub>3</sub>)  $\delta$  ppm: 8.01 - 8.03 (m, 2H), 7.81 - 7.87 (m, 4H), 7.64 (d,  $J$  = 8.0 Hz, 2H), 7.52 - 7.56 (t, 1H), 7.38 - 7.42 (t, 2H), 7.23 (d,  $J$  = 8.0 Hz, 2H), 4.12 (s, 2H); **<sup>13</sup>C NMR** (100 MHz, CDCl<sub>3</sub>)  $\delta$  ppm: 199.6, 196.4, 141.6, 138.2, 135.4, 135.0, 134.9, 133.8, 128.8, 128.6, 128.3, 123.5, 94.2, 59.1, 47.2; **HRMS** (ESI-TOF)  $m/z$  calcd for C<sub>23</sub>H<sub>16</sub>IO<sub>3</sub> [M + H]<sup>+</sup> 467.0139, found 467.0141.

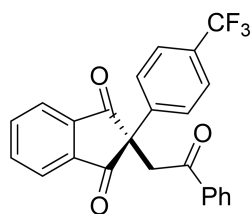

2-(2-Oxo-2-phenylethyl)-2-(4-(trifluoromethyl)phenyl)-1H-indene-1,3(2H)-dione (**3l**): Obtained as a yellow solid (53.0 mg, 65% yield), eluting with 10% EtOAc in PE (elution gradient); **<sup>1</sup>H NMR** (400 MHz, CDCl<sub>3</sub>)  $\delta$  ppm: 8.03 - 8.05 (q, 2H), 7.99 (d,  $J$  = 8.4 Hz, 2H), 7.83 - 7.85 (m, 2H), 7.69 (d,  $J$  = 8.0 Hz, 2H), 7.48 (d,  $J$  = 7.6 Hz, 2H), 7.26 - 7.36 (m, 3H), 4.16 (s, 2H); **<sup>13</sup>C NMR** (100 MHz, CDCl<sub>3</sub>)  $\delta$  ppm: 199.8, 195.9, 141.6, 137.6, 135.5, 134.9 ( $J$ ,  $t$  = 15.6 Hz), 129.3, 128.6, 128.2, 126.9, 125.7 (q,  $t$  = 3.6 Hz), 123.5 (q,  $t$  = 271.3 Hz), 123.4, 59.6, 47.2. **<sup>19</sup>F NMR** (400 MHz, CDCl<sub>3</sub>)  $\delta$  -57.8; **HRMS** (ESI-TOF)  $m/z$  calcd for C<sub>24</sub>H<sub>16</sub>F<sub>3</sub>O<sub>3</sub> [M + H]<sup>+</sup> 409.1046, found 409.1047.

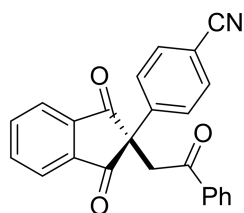

4-(1,3-Dioxo-2-(2-oxo-2-phenylethyl)-2,3-dihydro-1H-inden-2-yl)benzonitrile (**3m**): Obtained as a yellow solid (46.7 mg, 64% yield), eluting with 10% EtOAc in PE (elution gradient); **<sup>1</sup>H NMR** (400 MHz, CDCl<sub>3</sub>)  $\delta$  ppm: 8.03 - 8.07 (m,

2H), 7.86 - 7.90 (m, 4H), 7.56 - 7.66 (m, 5H), 7.41 - 7.45 (t, 2H), 4.14 (s, 2H); <sup>13</sup>C NMR (100 MHz, CDCl<sub>3</sub>) δ ppm: 199.2, 196.0, 141.6, 140.5, 135.7, 134.7, 134.0, 132.8, 128.7, 128.3, 127.9, 123.7, 118.2, 112.2, 59.3, 47.4; HRMS (ESI-TOF) m/z calcd for C<sub>24</sub>H<sub>16</sub>NO<sub>3</sub> [M + H]<sup>+</sup> 366.1125, found 366.1123.

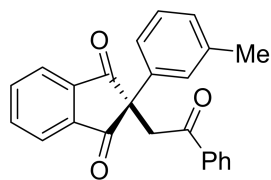

2-(2-Oxo-2-phenylethyl)-2-(*m*-tolyl)-1H-indene-1,3(2H)-dione

**(3n)**. Obtained as a yellow solid (63.0 mg, 89% yield), eluting with 10% EtOAc in PE (elution gradient); <sup>1</sup>H NMR (400 MHz, CDCl<sub>3</sub>) δ ppm: 8.02 - 8.04 (q, 2H), 7.88 (d, *J* = 7.6 Hz, 2H), 7.81 - 7.83 (q, 2H), 7.53 - 7.56 (t, 1H), 7.39 - 7.42 (t, 2H), 7.25 - 7.29 (m, 2H), 7.19 - 7.22 (t, 1H), 7.08 (d, *J* = 7.6 Hz, 1H), 4.15 (s, 2H), 2.31 (s, 3H); <sup>13</sup>C NMR (100 MHz, CDCl<sub>3</sub>) δ ppm: 200.1, 196.7, 141.8, 139.0, 135.2, 135.1, 133.7, 129.0, 128.8, 128.6, 128.3, 127.5, 124.0, 123.5, 59.7, 47.3, 21.5; HRMS (ESI-TOF) m/z calcd for C<sub>24</sub>H<sub>19</sub>O<sub>3</sub> [M + H]<sup>+</sup> 355.1329, found 355.1325.

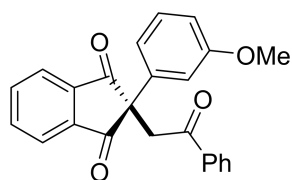

2-(3-Methoxyphenyl)-2-(2-oxo-2-phenylethyl)-1H-indene-1,3(2H)-dione **(3o)**.

Obtained as a yellow solid (61.4 mg, 83% yield), eluting with 10% EtOAc in PE (elution gradient); <sup>1</sup>H NMR (400 MHz, CDCl<sub>3</sub>) δ ppm: 7.93 - 7.96 (q, 2H), 7.80 (d, *J* = 7.2 Hz, 2H), 7.73 - 7.75 (q, 2H), 7.45 - 7.49 (m, 1H), 7.31 - 7.35 (t, 2H), 7.13 - 7.18 (t, 1H), 6.95 - 6.97 (m, 2H), 6.72 - 6.74 (m, 1H), 4.08 (s, 2H), 3.69 (s, 3H); <sup>13</sup>C NMR (100 MHz, CDCl<sub>3</sub>) δ ppm: 199.9, 196.7, 160.1, 141.8, 136.7, 135.3, 135.1, 133.7, 130.1, 128.6, 128.3, 123.5, 119.1, 113.4, 112.9, 59.6, 55.3, 47.3; HRMS (ESI-TOF) m/z calcd for C<sub>24</sub>H<sub>19</sub>O<sub>4</sub> [M + H]<sup>+</sup> 371.1278, found 371.1276.

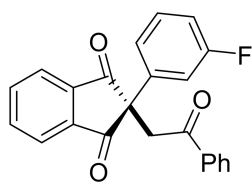

2-(3-Fluorophenyl)-2-(2-oxo-2-phenylethyl)-1H-indene-1,3(2H)-dione (**3p**). Obtained as a yellow solid (47.3 mg, 66% yield), eluting with 10% EtOAc in PE (elution gradient); **<sup>1</sup>H NMR** (400 MHz, CDCl<sub>3</sub>) δ ppm: 8.02 - 8.05 (m, 2H), 7.83 - 7.88 (m, 4H), 7.54 - 7.57 (t, 1H), 7.39 - 7.43 (t, 2H), 7.22 - 7.32 (m, 3H), 6.95 - 7.00 (m, 1H), 4.15 (s, 2H); **<sup>13</sup>C NMR** (100 MHz, CDCl<sub>3</sub>) δ ppm: 199.5, 196.4, 163.0 (d, *J* = 246.0 Hz), 141.7, 137.6 (d, *J* = 7.3 Hz), 135.5, 135.0, 133.8, 130.6 (d, *J* = 8.2 Hz), 128.6, 128.3, 123.6, 122.6 (d, *J* = 3.0 Hz), 115.1 (d, *J* = 20.8 Hz), 114.4 (d, *J* = 23.2 Hz), 59.2, 47.3; **<sup>19</sup>F NMR** (400 MHz, CDCl<sub>3</sub>) δ -117.7; **HRMS** (ESI-TOF) *m/z* calcd for C<sub>23</sub>H<sub>16</sub>FO<sub>3</sub> [M + H]<sup>+</sup> 359.1078, found 359.1075.

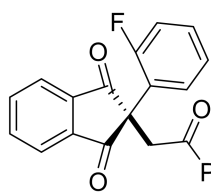

2-(2-Fluorophenyl)-2-(2-oxo-2-phenylethyl)-1H-indene-1,3(2H)-dione (**3q**). Obtained as a yellow solid (43.7 mg, 61% yield), eluting with 10% EtOAc in PE (elution gradient); mp 217-219 °C; **<sup>1</sup>H NMR** (400 MHz, CDCl<sub>3</sub>) δ ppm: 8.03 - 8.07 (m, 2H), 7.89 - 7.91 (m, 2H), 7.83 - 7.87 (m, 2H), 7.54 - 7.58 (t, 1H), 7.40 - 7.44 (t, 2H), 7.34 - 7.39 (m, 1H), 7.23 - 7.29 (m, 1H), 7.09 - 7.13 (m, 1H), 6.98 - 7.03 (m, 1H), 4.38 (s, 2H); **<sup>13</sup>C NMR** (100 MHz, CDCl<sub>3</sub>) δ ppm: 199.2, 196.6, 160.7 (d, *J* = 249.0 Hz), 142.0 (d, *J* = 1.7 Hz), 135.2, 135.1, 133.8, 130.0 (d, *J* = 8.8 Hz), 129.5 (d, *J* = 4.0 Hz), 128.6, 128.3, 124.8 (d, *J* = 3.2 Hz), 123.4, 123.0 (d, *J* = 12.4 Hz), 117.0 (d, *J* = 23.2 Hz), 57.8 (d, *J* = 3.9 Hz), 44.1 (d, *J* = 3.7 Hz); **<sup>19</sup>F NMR** (400 MHz, CDCl<sub>3</sub>) δ -105.5; **HRMS** (ESI-TOF) *m/z* calcd for C<sub>23</sub>H<sub>16</sub>FO<sub>3</sub> [M + H]<sup>+</sup> 359.1078, found 359.1077.

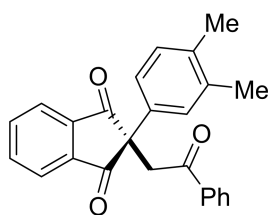

2-(3,4-Dimethylphenyl)-2-(2-oxo-2-phenylethyl)-1H-indene-1,3(

2H)-dione (**3r**). Obtained as a yellow solid (66.2 mg, 90% yield), eluting with 10% EtOAc in PE (elution gradient); mp 221-223 °C; <sup>1</sup>H NMR (400 MHz, CDCl<sub>3</sub>) δ ppm: 7.99 - 8.02 (q, 2H), 7.87 (d, *J* = 7.2 Hz, 2H), 7.78 - 7.80 (q, 2H), 7.51 - 7.55 (t, 1H), 7.37 - 7.41 (t, 2H), 7.24 (d, *J* = 2.0 Hz, 1H), 7.18 - 7.20 (m, 1H), 7.08 (d, *J* = 8.0 Hz, 1H), 4.14 (s, 2H), 2.22 (s, 3H), 2.19 (s, 3H); <sup>13</sup>C NMR (100 MHz, CDCl<sub>3</sub>) δ ppm: 200.1, 196.8, 141.7, 137.6, 136.7, 135.2, 135.1, 133.7, 132.6, 130.3, 128.6, 128.3, 127.9, 124.3, 123.5, 59.4, 47.3, 19.9, 19.2; HRMS (ESI-TOF) *m/z* calcd for C<sub>25</sub>H<sub>21</sub>O<sub>3</sub> [M + H]<sup>+</sup> 369.1485, found 369.1482.

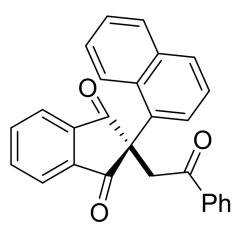

2-(Naphthalen-1-yl)-2-(2-oxo-2-phenylethyl)-1H-indene-1,3(2H)-dione (**3s**). Obtained as a yellow liquid (60.1 mg, 77% yield), eluting with 10% EtOAc in PE (elution gradient); <sup>1</sup>H NMR (400 MHz, CDCl<sub>3</sub>) δ ppm: 8.05 - 8.07 (q, 2H), 7.77 - 7.79 (m, 8H), 7.69 (d, *J* = 8.4 Hz, 1H), 7.53 - 7.57 (t, 1H), 7.39 - 7.47 (m, 4H), 4.26 (s, 2H); <sup>13</sup>C NMR (100 MHz, CDCl<sub>3</sub>) δ ppm: 200.0, 196.7, 141.7, 135.3, 135.0, 133.8, 133.2, 132.6, 132.4, 129.0, 128.6, 128.3, 128.1, 127.5, 126.6, 126.5, 126.3, 124.2, 123.6, 59.8, 47.3; HRMS (ESI-TOF) *m/z* calcd for C<sub>27</sub>H<sub>19</sub>O<sub>3</sub> [M + H]<sup>+</sup> 391.1329, found 391.1325.

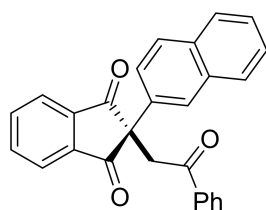

2-(Naphthalen-2-yl)-2-(2-oxo-2-phenylethyl)-1H-indene-1,3(2H)-dione (**3t**). Obtained as a yellow solid (71.0 mg, 91% yield), eluting with 10% EtOAc in PE (elution gradient); <sup>1</sup>H NMR (400 MHz, CDCl<sub>3</sub>) δ ppm: 8.03 - 8.06 (q, 2H), 7.86 - 7.89 (m, 3H), 7.76 - 7.84 (m, 5H), 7.68 - 7.70 (q, 1H), 7.52 - 7.55 (t, 1H), 7.44 - 7.46 (m, 2H), 7.38 - 7.42 (t, 2H), 4.26 (s, 2H); <sup>13</sup>C NMR (100 MHz, CDCl<sub>3</sub>) δ ppm: 200.0, 196.6, 141.6, 135.3, 134.9, 133.8, 133.2, 132.6, 132.4, 129.0, 128.6, 128.3, 128.1,



127.4, 126.6, 126.5, 126.3, 124.2, 123.6, 59.8, 47.3. **HRMS** (ESI-TOF)  $m/z$  calcd for  $C_{27}H_{19}O_3$   $[M + H]^+$  391.1329, found 391.1326.

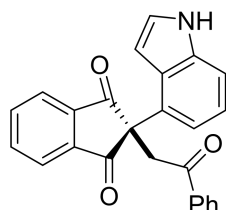

**2-(1H-indol-4-yl)-2-(2-oxo-2-phenylethyl)-1H-indene-1,3(2H)-dione (3u)**: Obtained as a yellow solid (66.7 mg, 88% yield), eluting with 10% EtOAc in PE (elution gradient);  **$^1H$  NMR** (400 MHz,  $CDCl_3$ )  $\delta$  ppm: 8.46 (s, 1H), 7.99 - 8.01 (q, 2H), 7.89 (d,  $J = 7.2$  Hz, 2H), 7.76 - 7.79 (q, 2H), 7.52 - 7.55 (t, 1H), 7.37 - 7.41 (t, 2H), 7.27 (d,  $J = 8.0$  Hz, 1H), 7.22 - 7.25 (m, 2H), 7.01 - 7.05 (t, 1H), 6.92 (d,  $J = 7.2$  Hz, 1H), 4.50 (s, 2H);  **$^{13}C$  NMR** (100 MHz,  $CDCl_3$ )  $\delta$  ppm: 199.9, 197.3, 141.7, 137.0, 135.3, 135.1, 133.6, 128.6, 128.3, 126.9, 125.7, 124.7, 123.5, 122.1, 119.4, 111.7, 103.3, 62.1, 44.1; **HRMS** (ESI-TOF)  $m/z$  calcd for  $C_{25}H_{18}NO_3$   $[M + H]^+$  380.1281, found 380.1283.

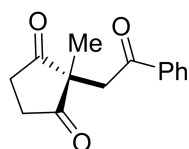

**2-Methyl-2-(2-oxo-2-phenylethyl)cyclopentane-1,3-dione (3v)**: Obtained as a yellow solid (30.8 mg, 67% yield), eluting with 10% EtOAc in PE (elution gradient);  **$^1H$  NMR** (400 MHz,  $CDCl_3$ )  $\delta$  ppm: 7.80 (d,  $J = 7.6$  Hz, 2H), 7.48 - 7.52 (t, 1H), 7.34 - 7.38 (t, 2H), 3.65 (s, 2H), 2.93 - 3.03 (m, 2H), 2.79 - 2.90 (m, 2H), 1.10 (s, 2H);  **$^{13}C$  NMR** (100 MHz,  $CDCl_3$ )  $\delta$  ppm: 216.5, 197.4, 134.7, 133.9, 128.6, 128.3, 52.4, 47.6, 34.7, 19.5; **HRMS** (ESI-TOF)  $m/z$  calcd for  $C_{14}H_{15}O_3$   $[M + H]^+$  231.1016, found 231.1018.

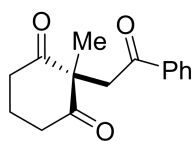

**2-Methyl-2-(2-oxo-2-phenylethyl)cyclohexane-1,3-dione (3w)**: Obtained as a yellow solid (34.6 mg, 71% yield), eluting with 10% EtOAc in PE (elution gradient);  **$^1H$  NMR** (400 MHz,  $CDCl_3$ )  $\delta$  ppm: 7.92 (d,  $J = 8.0$  Hz, 2H), 7.54

- 7.57 (t, 1H), 7.42 - 7.46 (t, 2H), 3.81 (s, 2H), 2.70 - 2.84 (m, 4H), 2.31 - 2.42 (m, 1H), 2.11 - 2.18 (m, 1H), 1.35 (s, 3H);  $^{13}\text{C}$  NMR (100 MHz,  $\text{CDCl}_3$ )  $\delta$  ppm: 210.7, 197.8, 135.6, 133.5, 128.5, 128.2, 60.0, 46.0, 37.7, 23.2, 17.5; HRMS (ESI-TOF)  $m/z$  calcd for  $\text{C}_{15}\text{H}_{17}\text{O}_3$   $[\text{M} + \text{H}]^+$  245.1172, found 245.1171.

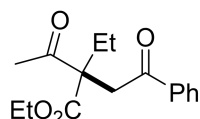

Ethyl-2-acetyl-2-ethyl-4-oxo-4-phenylbutanoate (**3x**): Obtained as a yellow solid (18.8 mg, 34% yield), eluting with 10% EtOAc in PE (elution gradient);  $^1\text{H}$  NMR (400 MHz,  $\text{CDCl}_3$ )  $\delta$  ppm: 7.98 (d,  $J = 8.0$  Hz, 2H), 7.56 - 7.59 (t, 1H), 7.45 - 7.48 (t, 2H), 4.18 - 4.23 (q, 2H), 3.61 - 3.74 (m, 2H), 2.38 (s, 3H), 2.04 - 2.22 (m, 2H), 1.21 - 1.25 (t, 3H), 0.82 - 0.86 (t, 3H);  $^{13}\text{C}$  NMR (100 MHz,  $\text{CDCl}_3$ )  $\delta$  ppm: 210.7, 197.8, 135.6, 133.5, 128.5, 128.2, 60.0, 46.0, 37.7, 23.2, 17.5;  $^{13}\text{C}$  NMR (101 MHz,  $\text{CDCl}_3$ )  $\delta$  205.8, 197.4, 171.9, 136.5, 133.3, 128.6, 128.0, 61.6, 61.4, 41.1, 27.3, 26.8, 14.0, 9.0; HRMS (ESI-TOF)  $m/z$  calcd for  $\text{C}_{16}\text{H}_{21}\text{O}_4$   $[\text{M} + \text{H}]^+$  277.1434, found 277.1433.

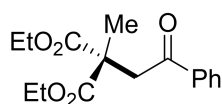

Diethyl 2-methyl-2-(2-oxo-2-phenylethyl)malonate (**3y**): Obtained as a yellow solid (38.5 mg, 66% yield), eluting with 10% EtOAc in PE (elution gradient);  $^1\text{H}$  NMR (400 MHz,  $\text{CDCl}_3$ )  $\delta$  ppm: 7.96 - 7.98 (t, 2H), 7.56 - 7.59 (t, 1H), 7.45 - 7.49 (t, 2H), 4.19 - 4.25 (q, 4H), 3.68 (s, 2H), 1.61 (s, 3H), 1.23 - 1.29 (t, 6H);  $^{13}\text{C}$  NMR (100 MHz,  $\text{CDCl}_3$ )  $\delta$  ppm: 196.4, 171.5, 136.6, 133.3, 128.6, 127.9, 61.5, 51.4, 44.2, 20.5, 13.9; HRMS (ESI-TOF)  $m/z$  calcd for  $\text{C}_{16}\text{H}_{21}\text{O}_5$   $[\text{M} + \text{H}]^+$  293.1384, found 293.1385.

# Copies of $^1\text{H}$ and $^{13}\text{C}$ NMR spectra of products

## $^1\text{H}$ NMR and $^{13}\text{C}$ NMR of 3a

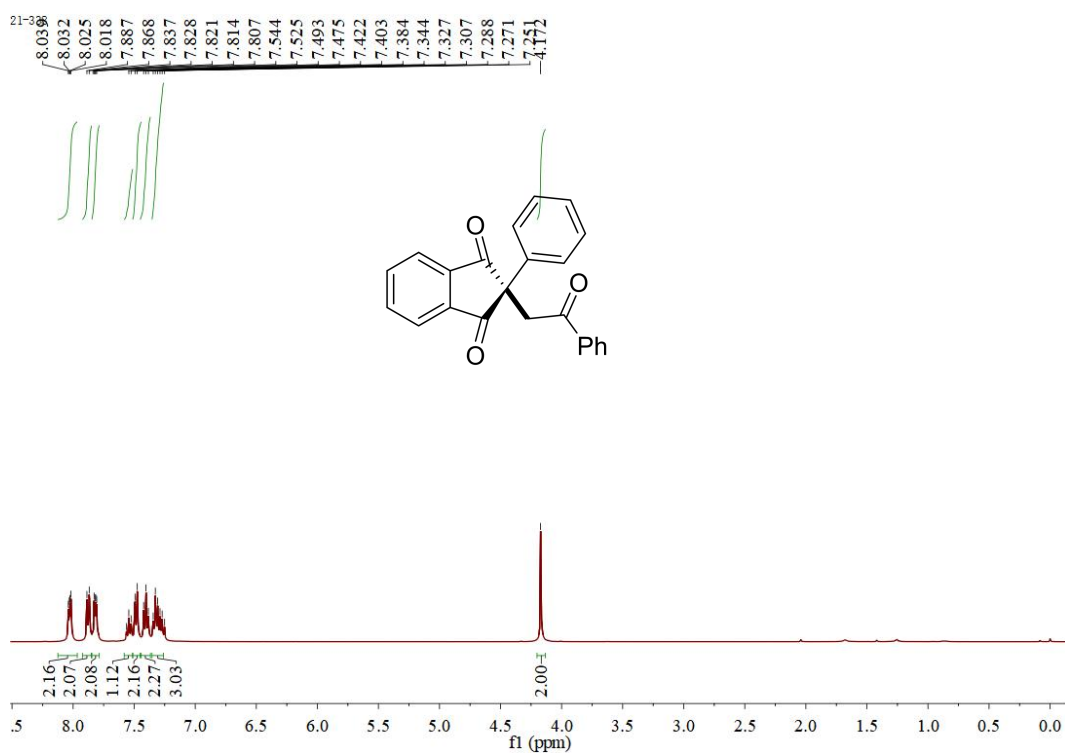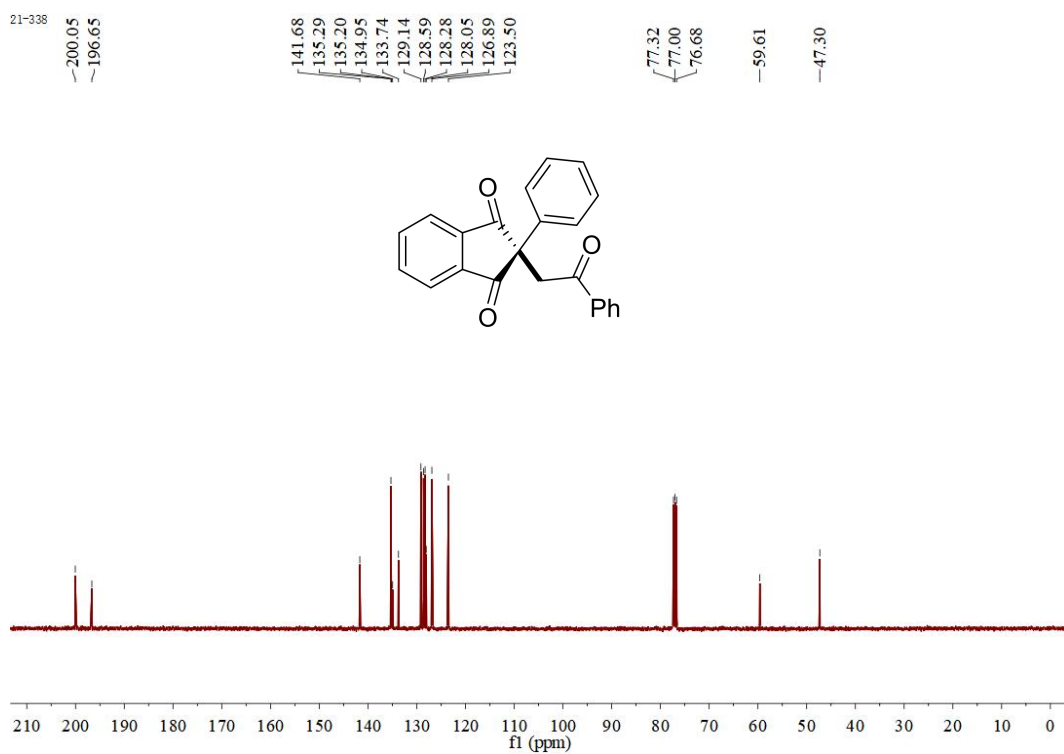

# <sup>1</sup>H NMR and <sup>13</sup>C NMR of 3b

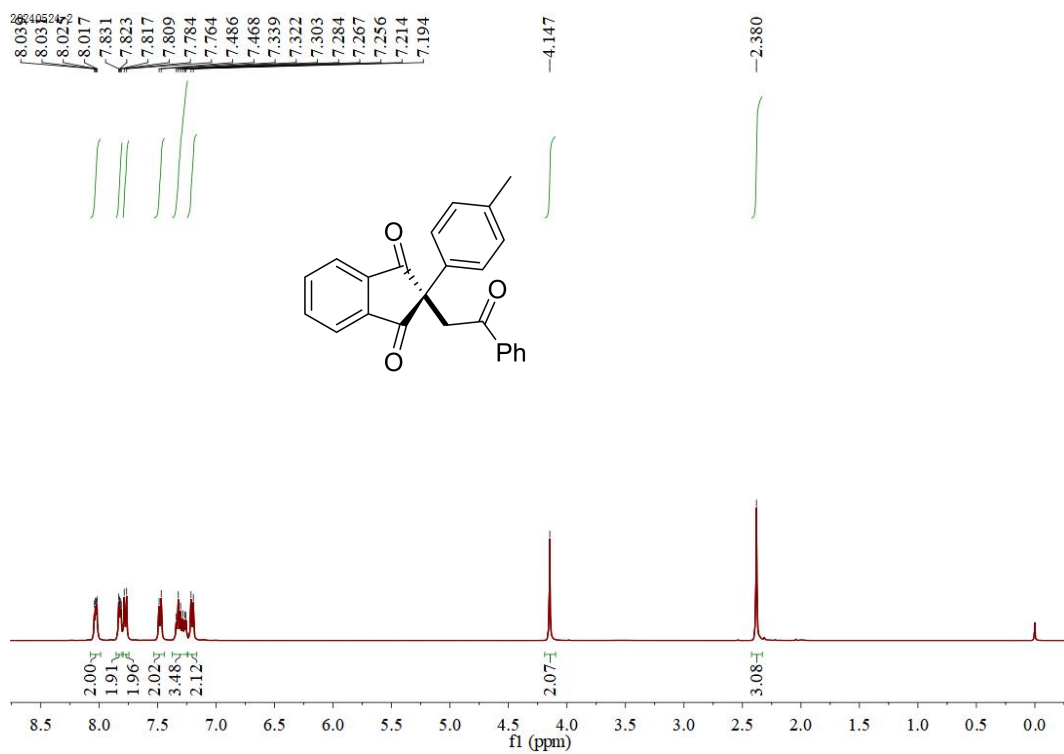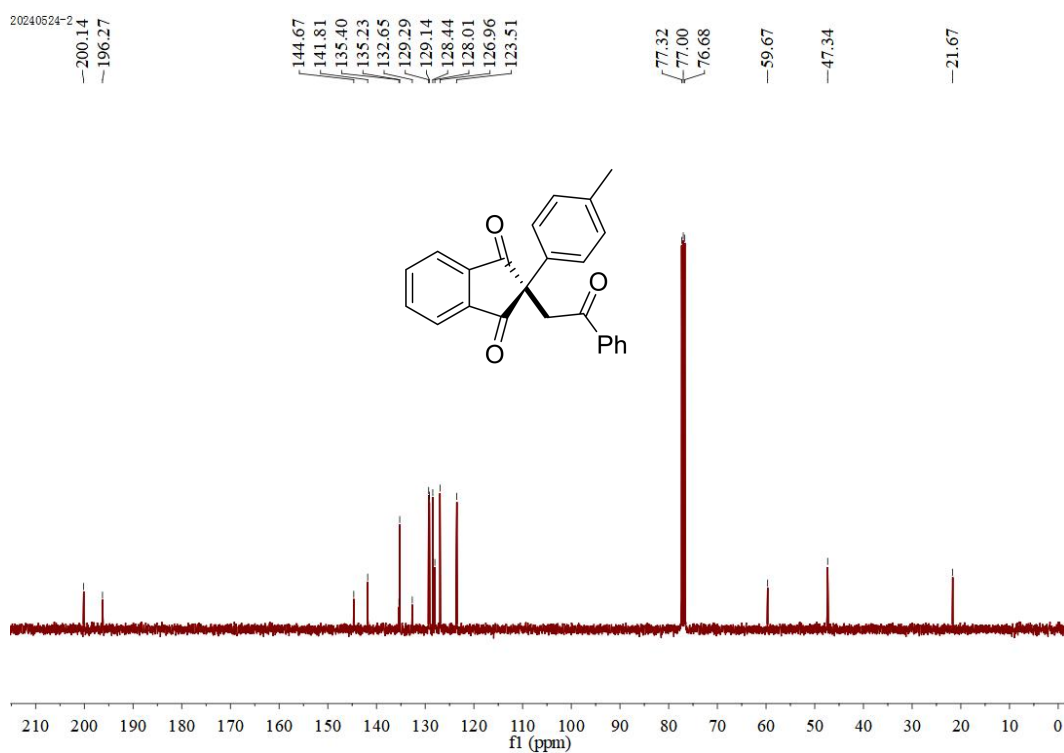

# <sup>1</sup>H NMR and <sup>13</sup>C NMR of 3c

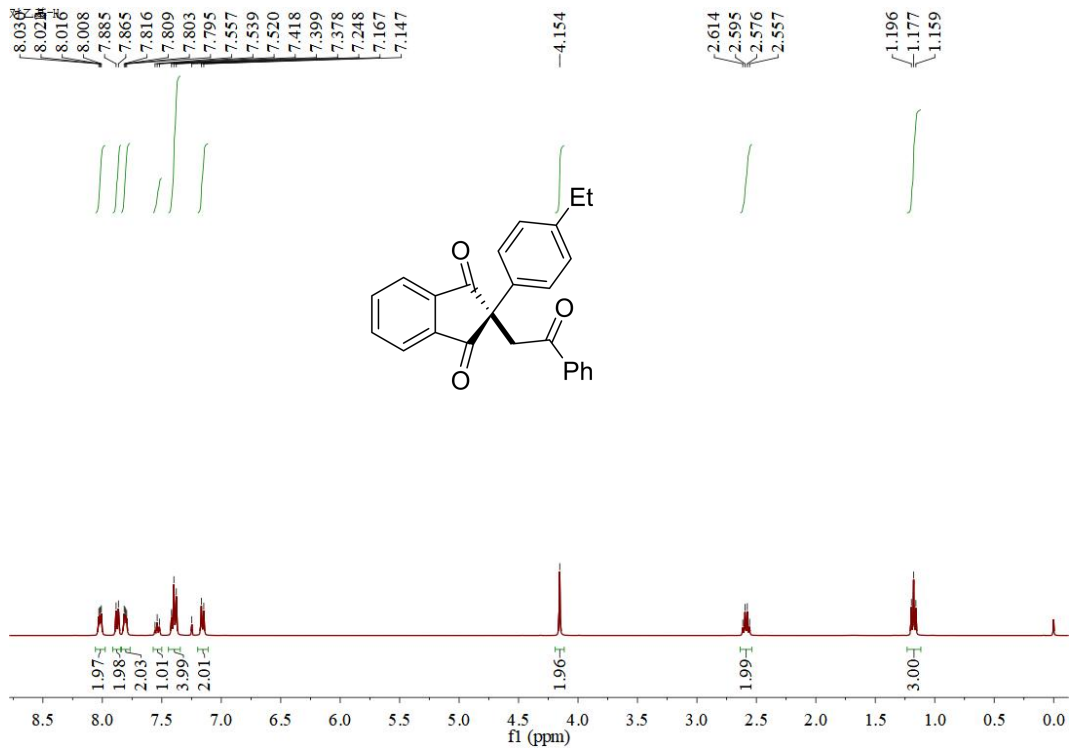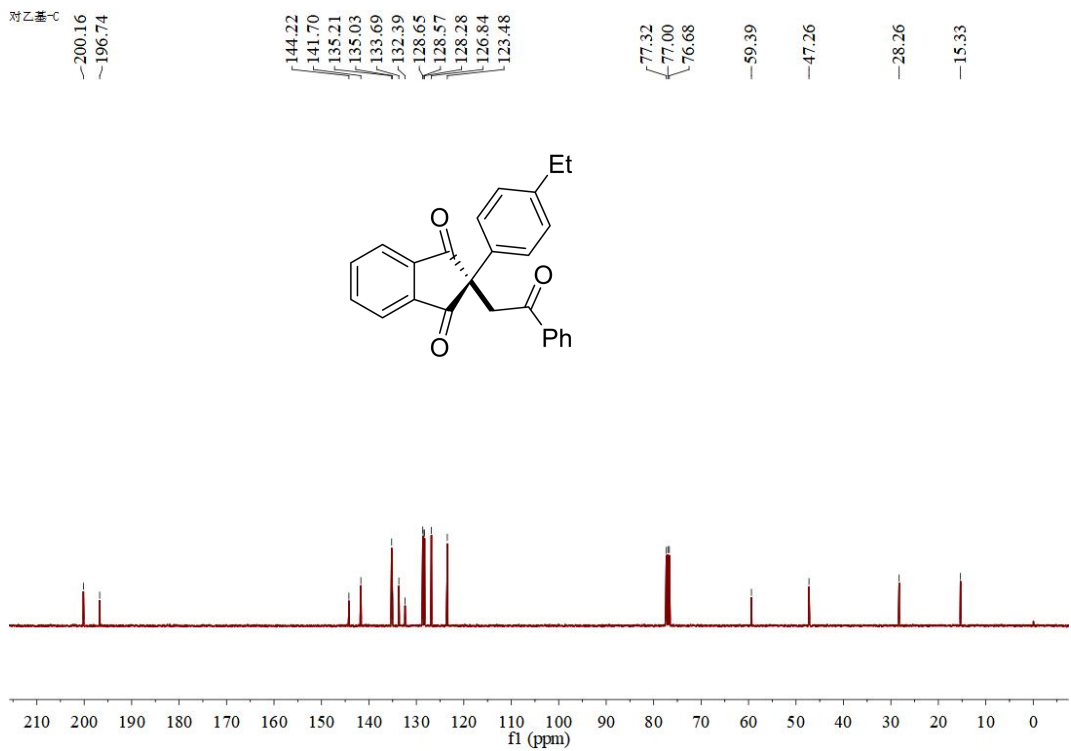

# <sup>1</sup>H NMR and <sup>13</sup>C NMR of 3d

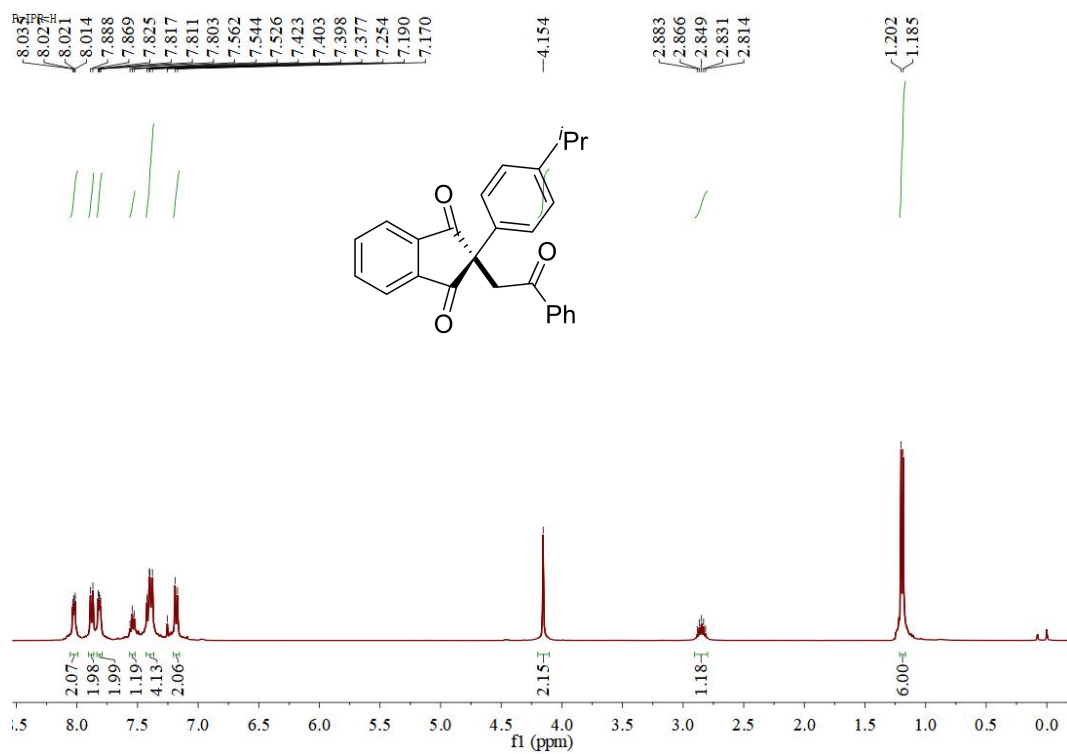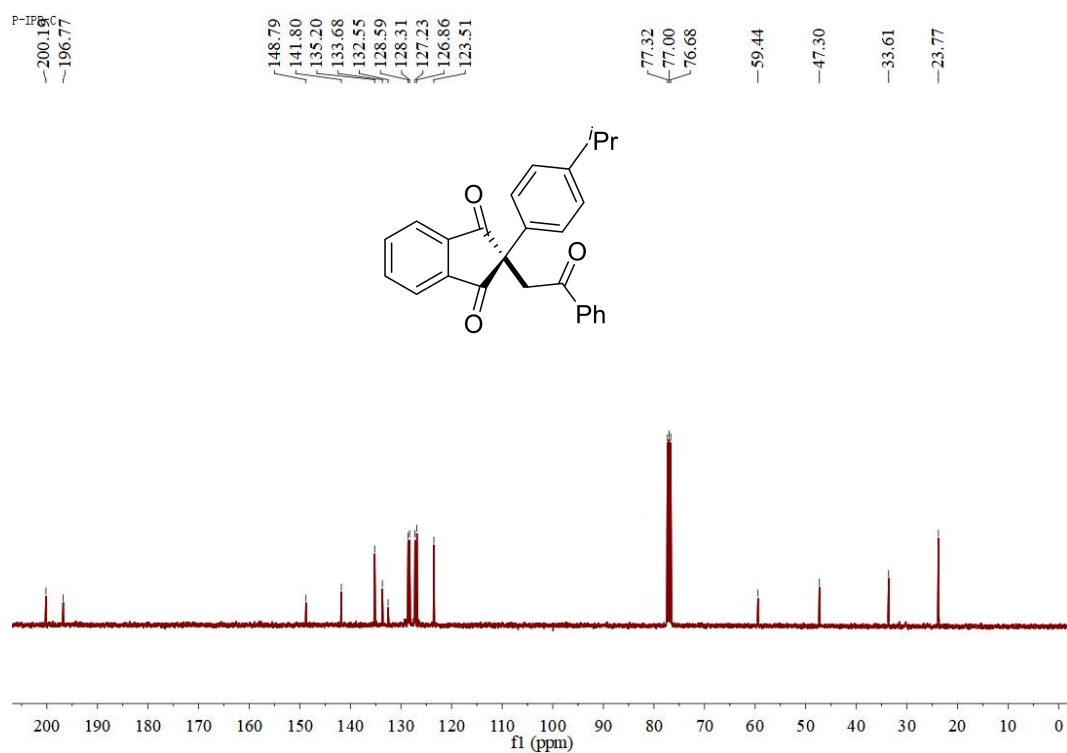

# <sup>1</sup>H NMR and <sup>13</sup>C NMR of 3e

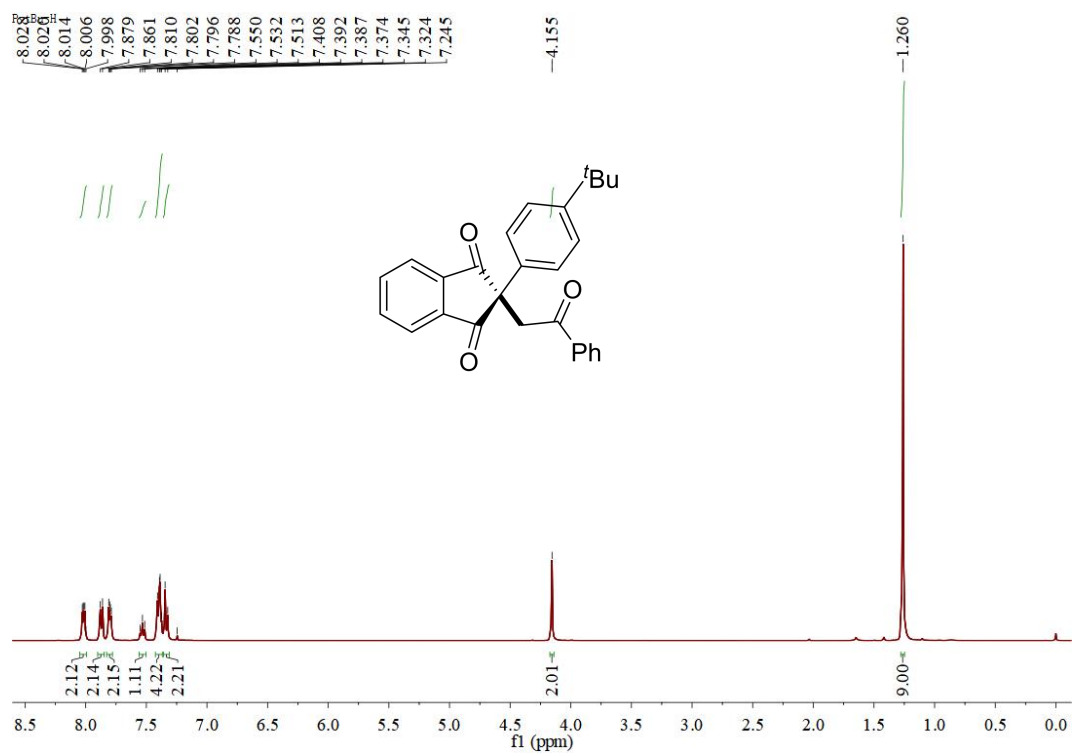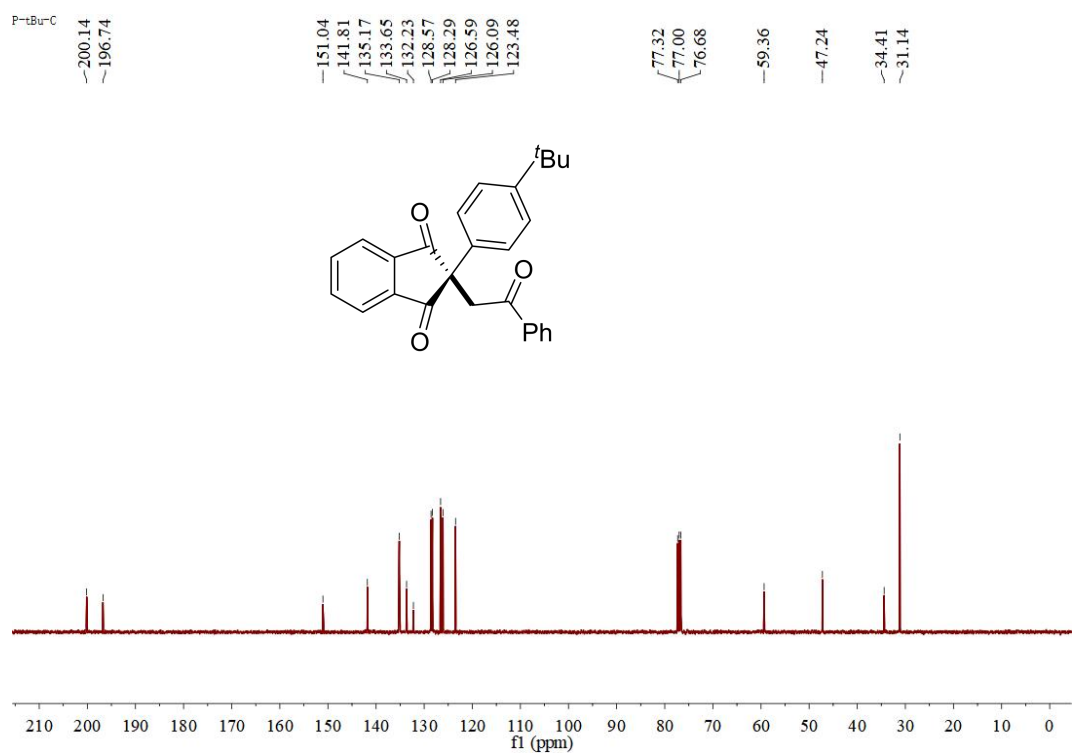

# <sup>1</sup>H NMR and <sup>13</sup>C NMR of 3f

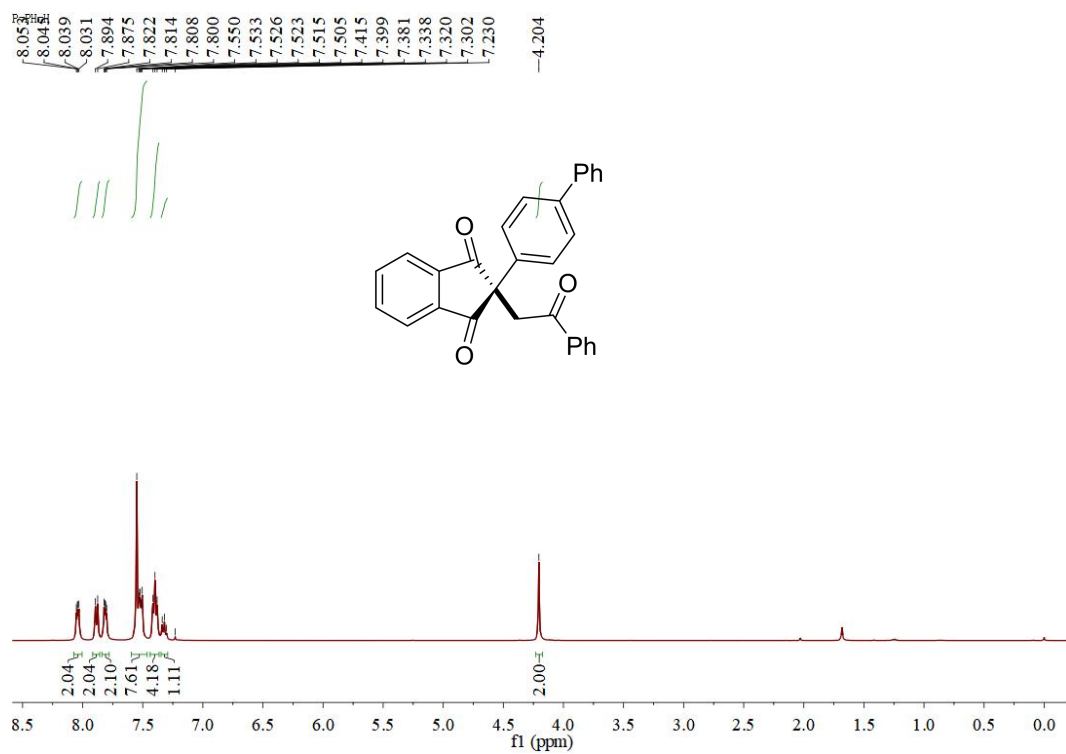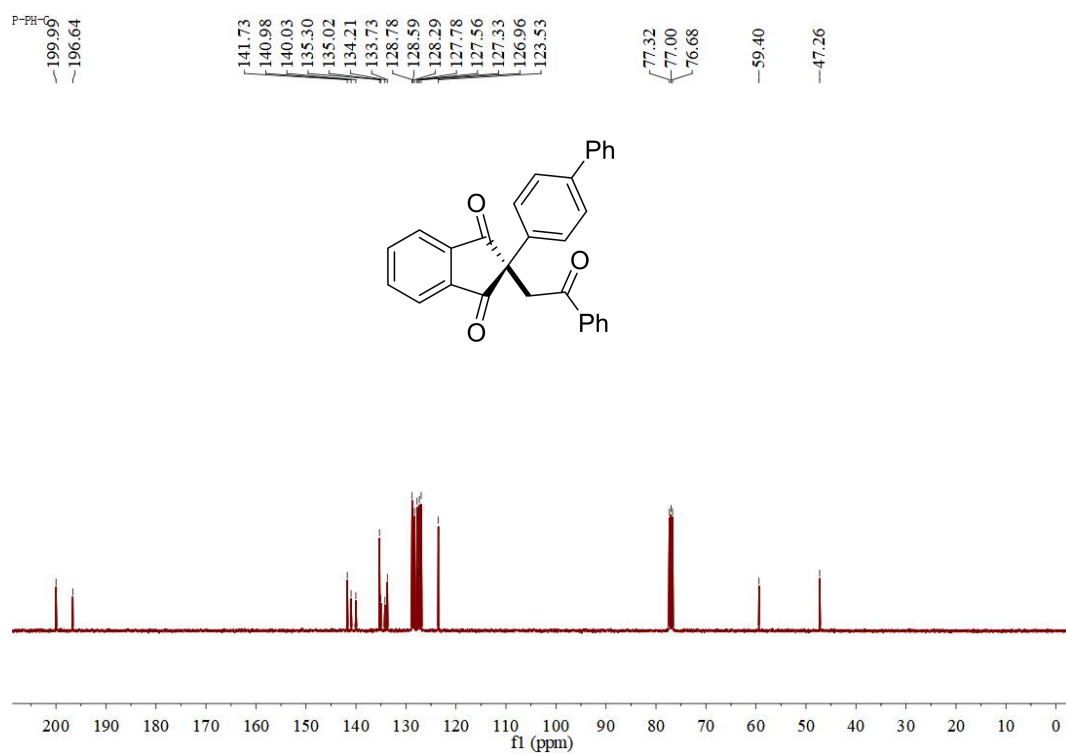



# <sup>1</sup>H NMR and <sup>13</sup>C NMR of 3g

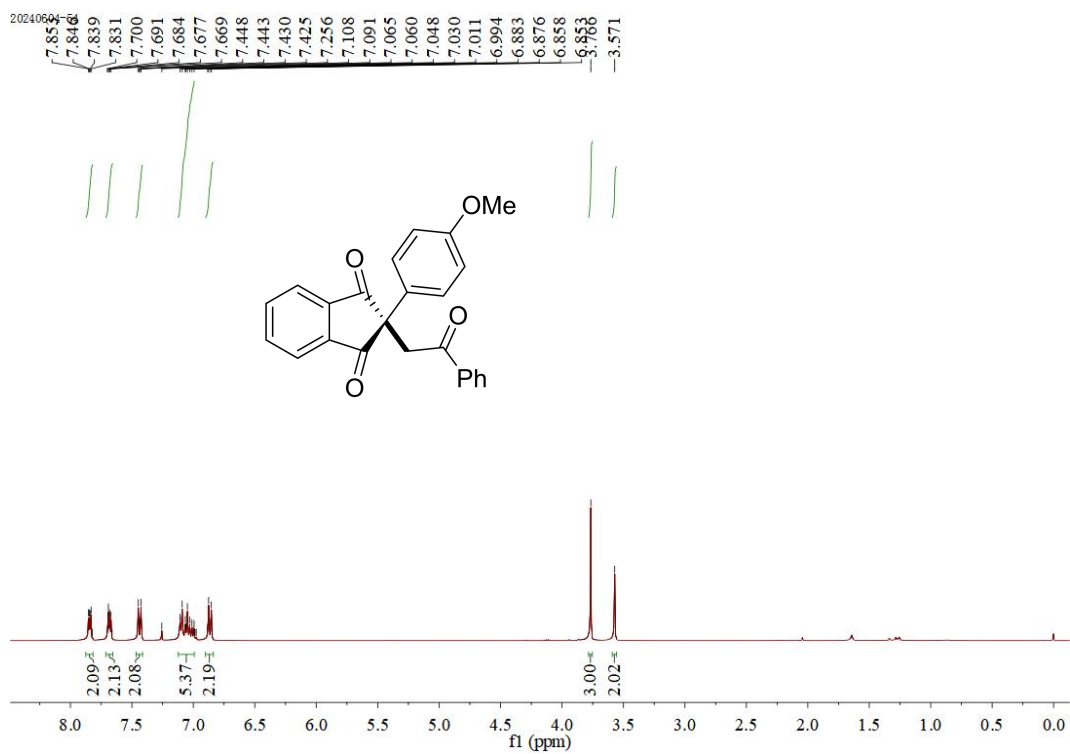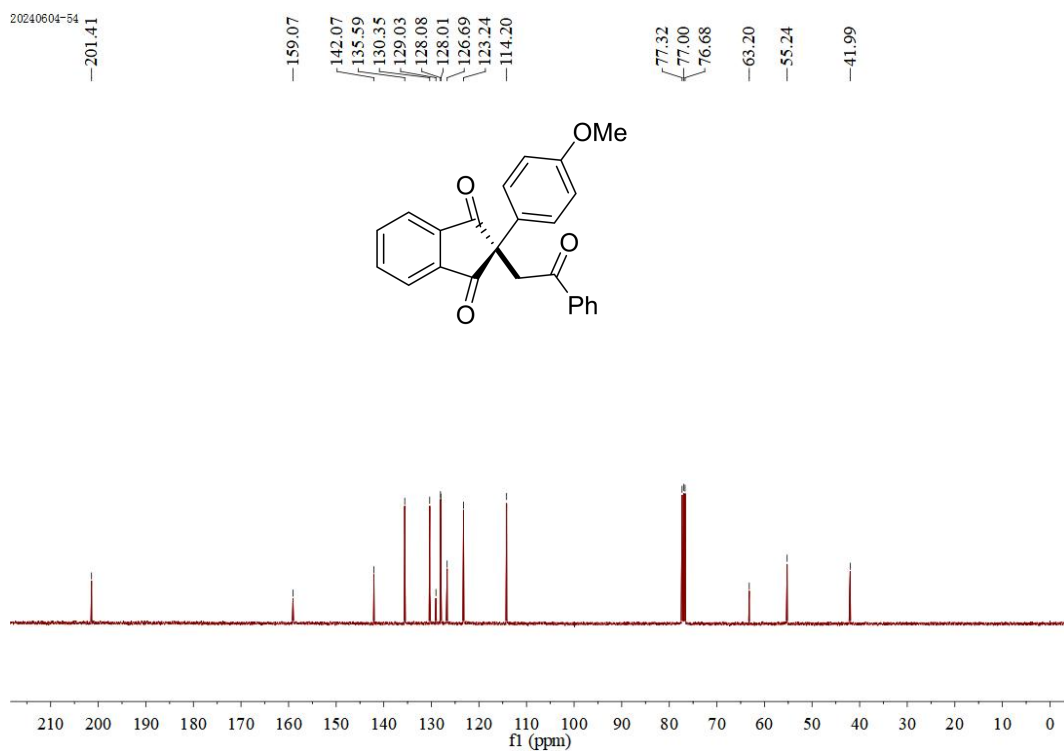

# <sup>1</sup>H NMR and <sup>13</sup>C NMR of 3h

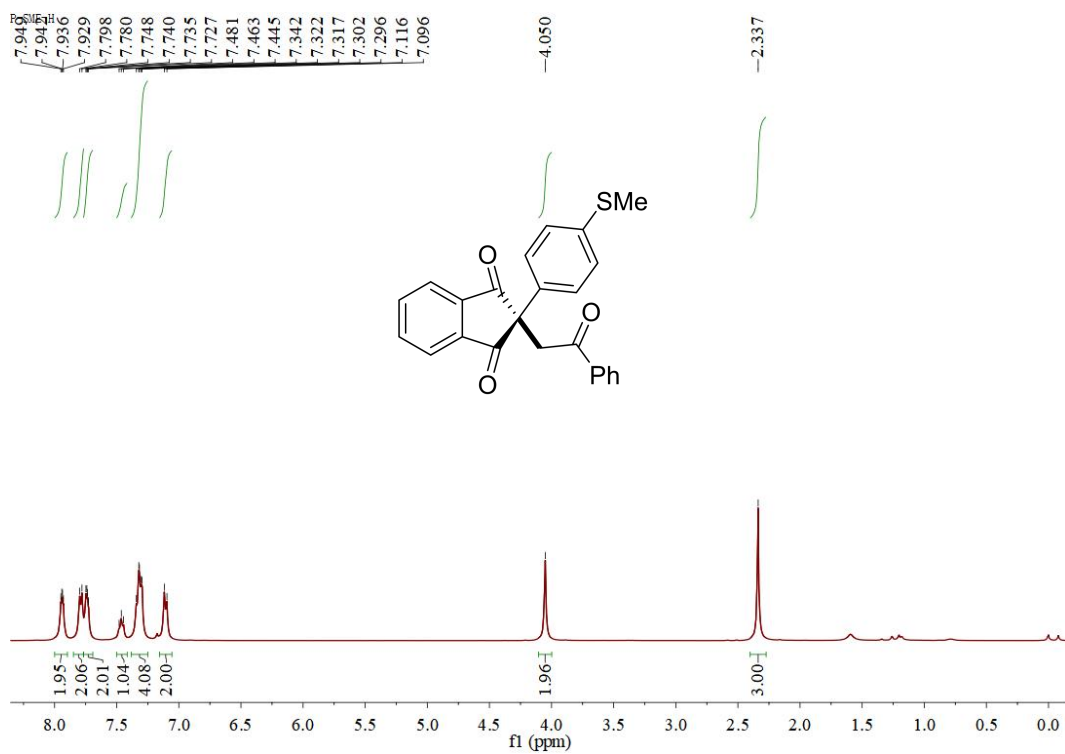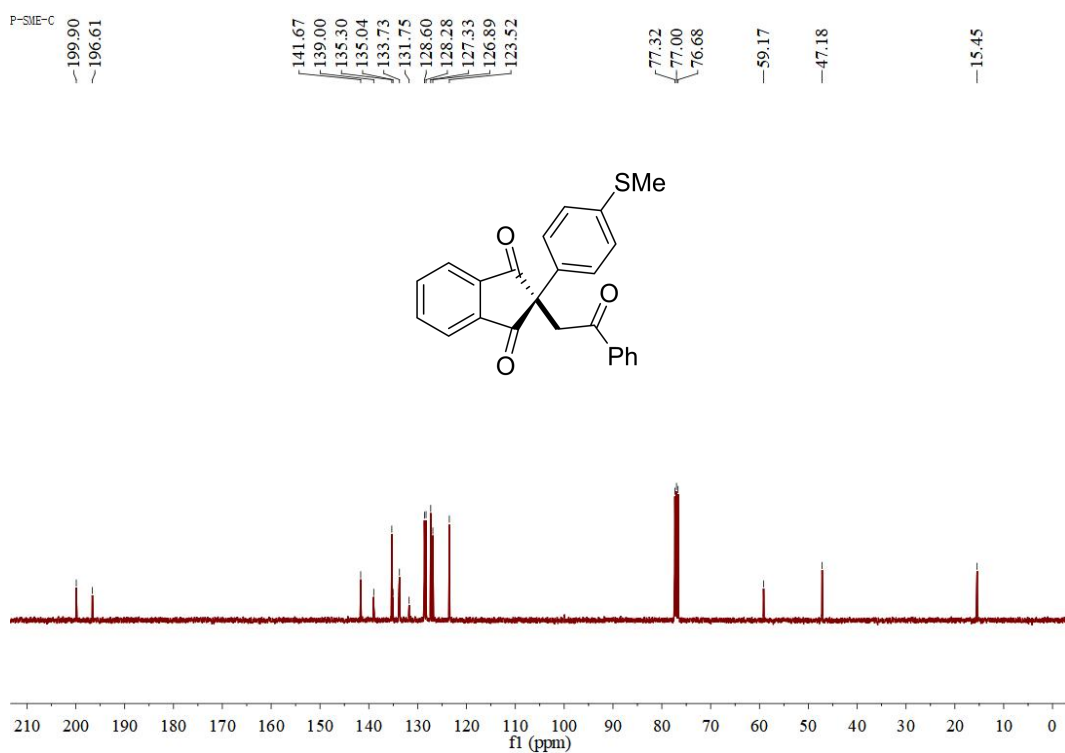

# <sup>1</sup>H NMR, <sup>13</sup>C NMR and <sup>19</sup>F NMR of 3i

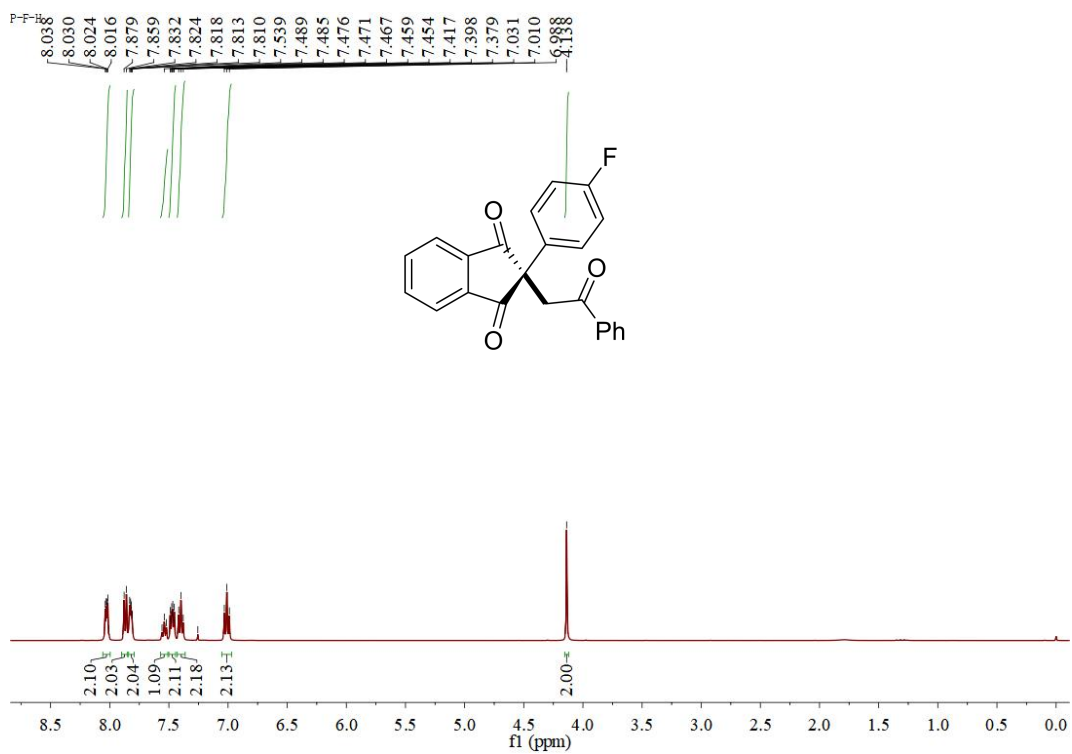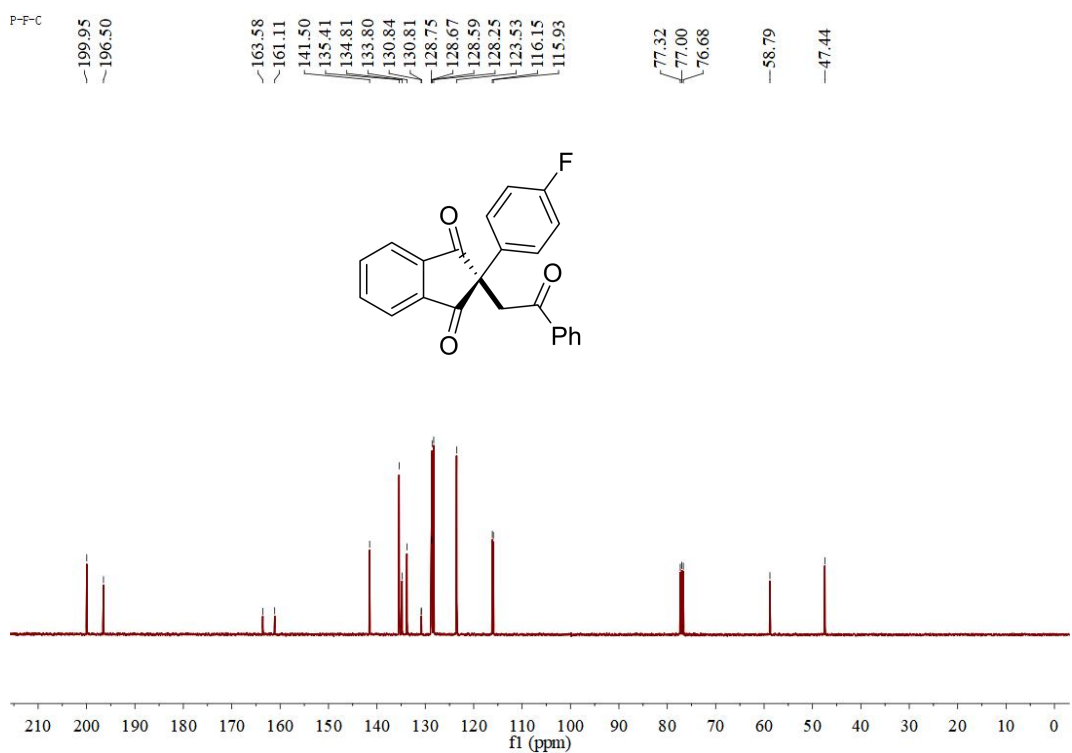

--116.11

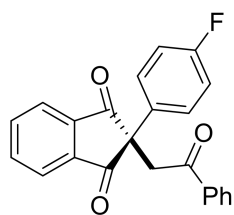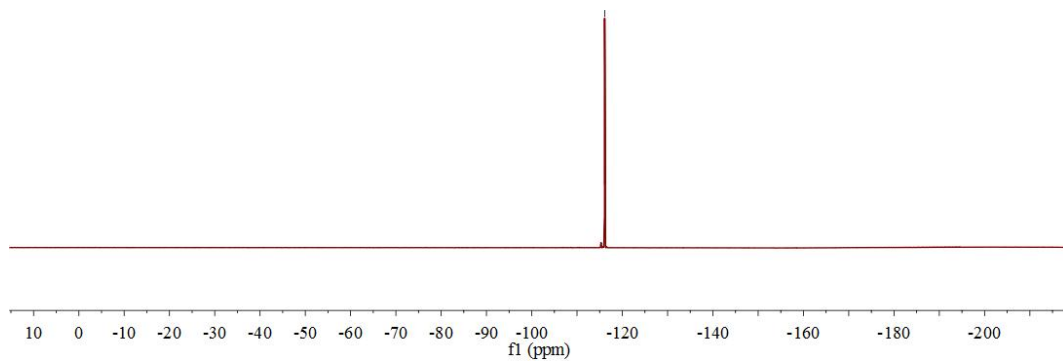

# $^1\text{H}$ NMR and $^{13}\text{C}$ NMR of 3j

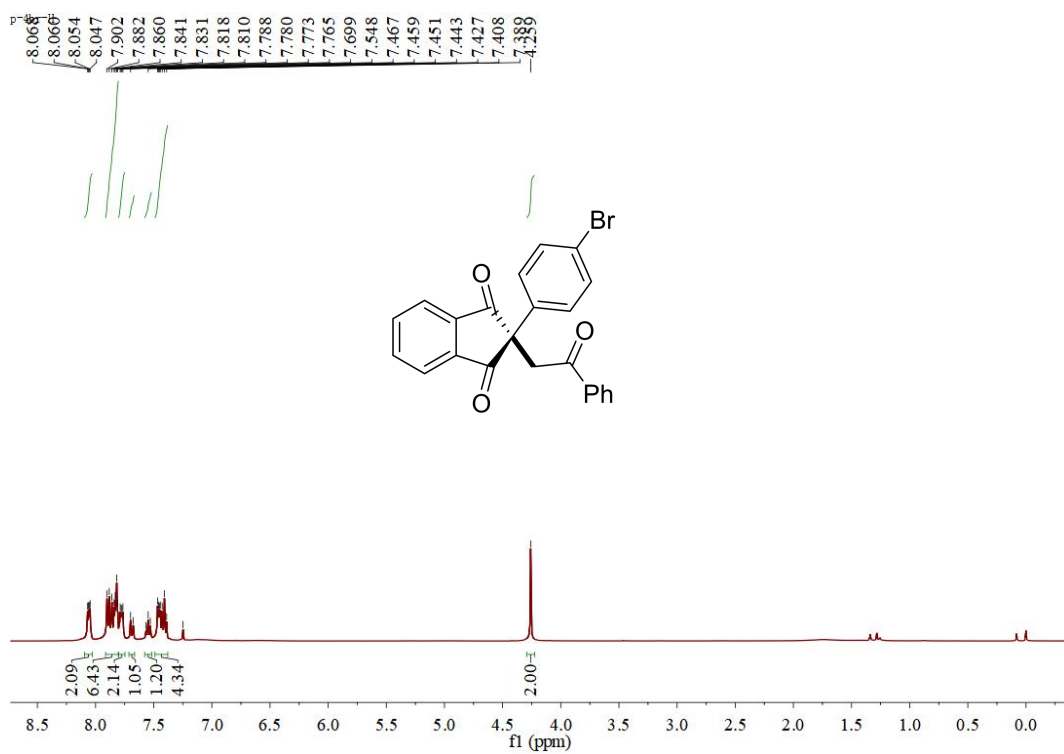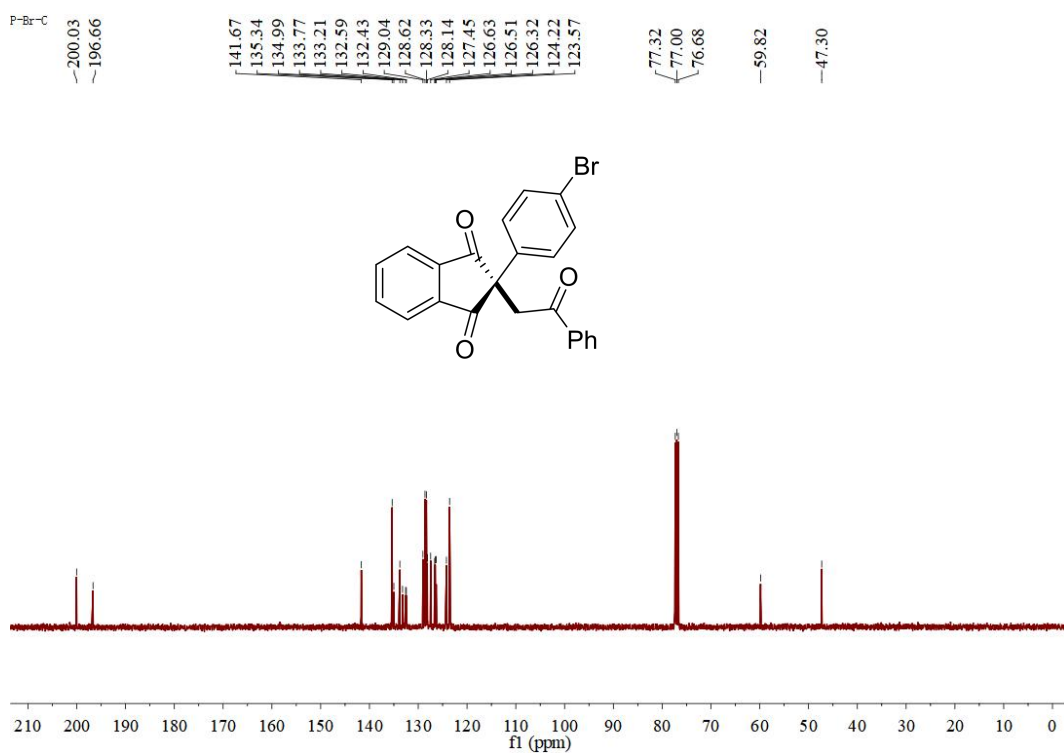

# <sup>1</sup>H NMR and <sup>13</sup>C NMR of 3k

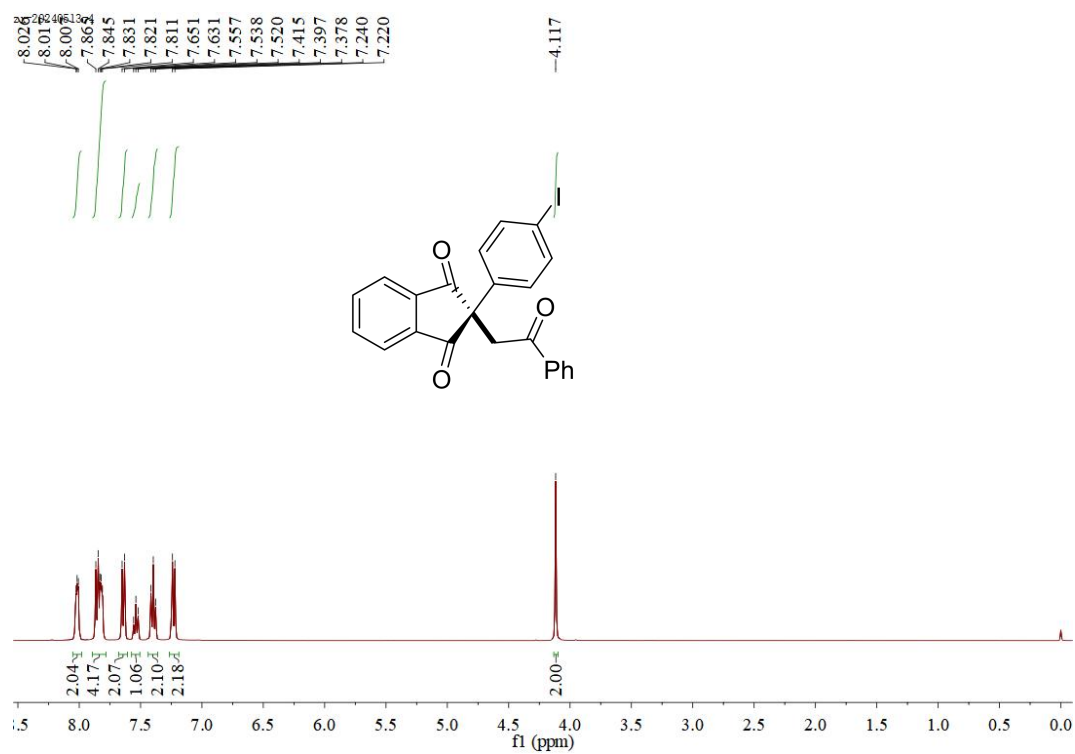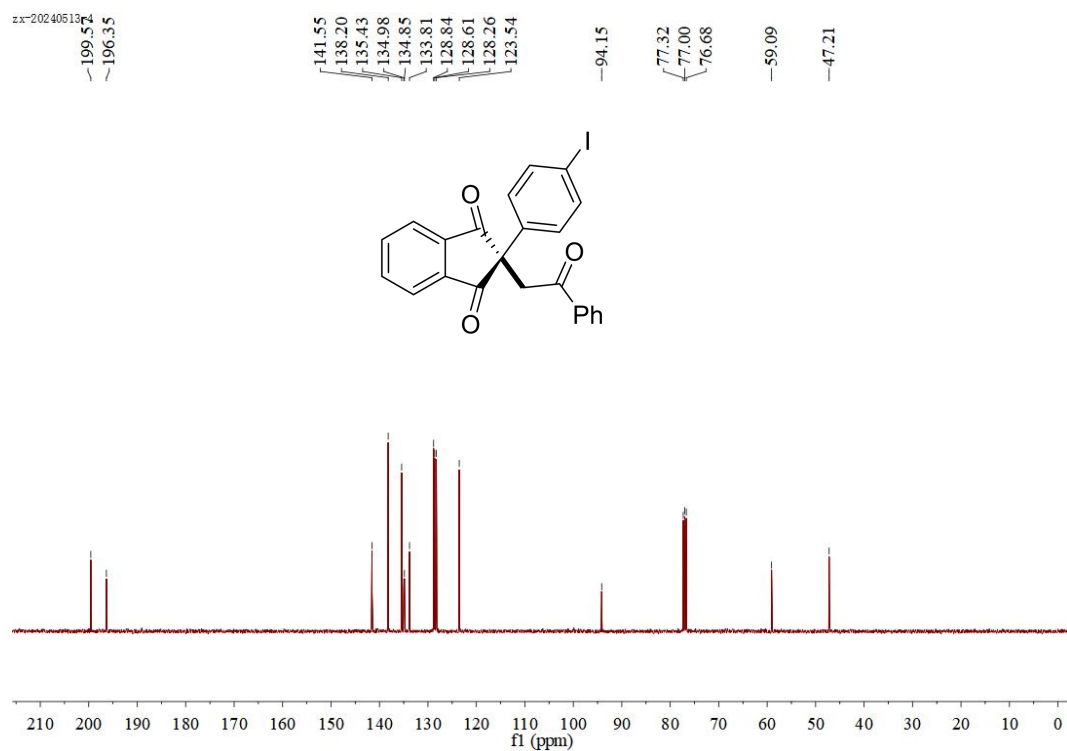

# <sup>1</sup>H NMR, <sup>13</sup>C NMR and <sup>19</sup>F NMR of 31

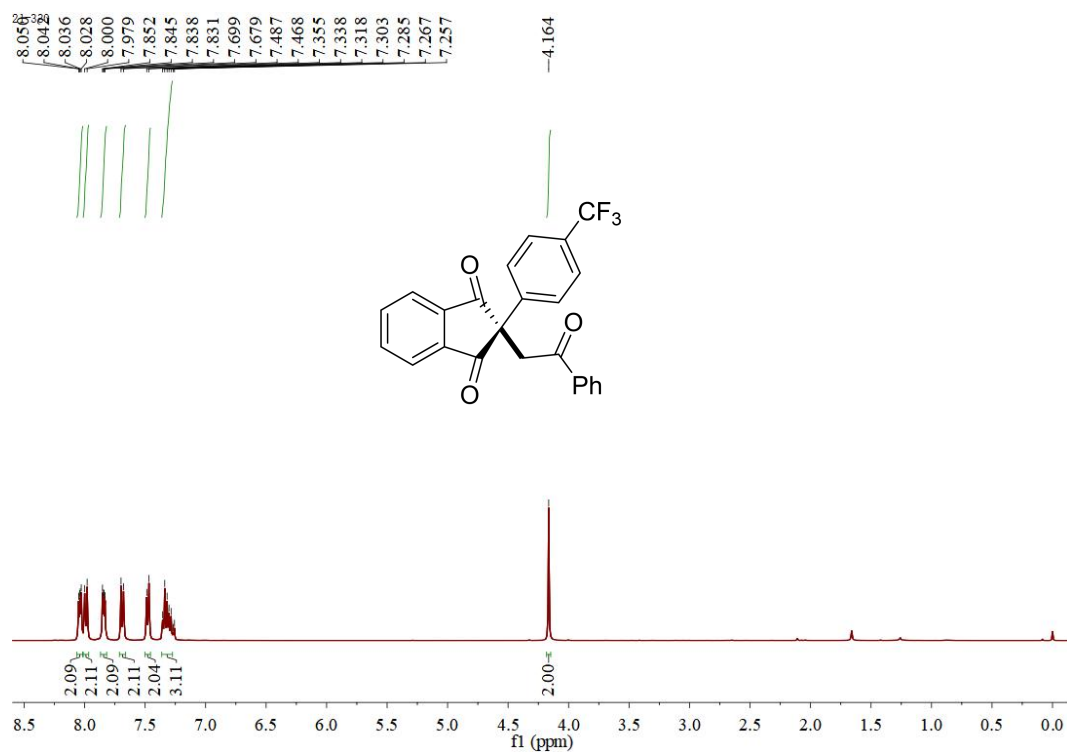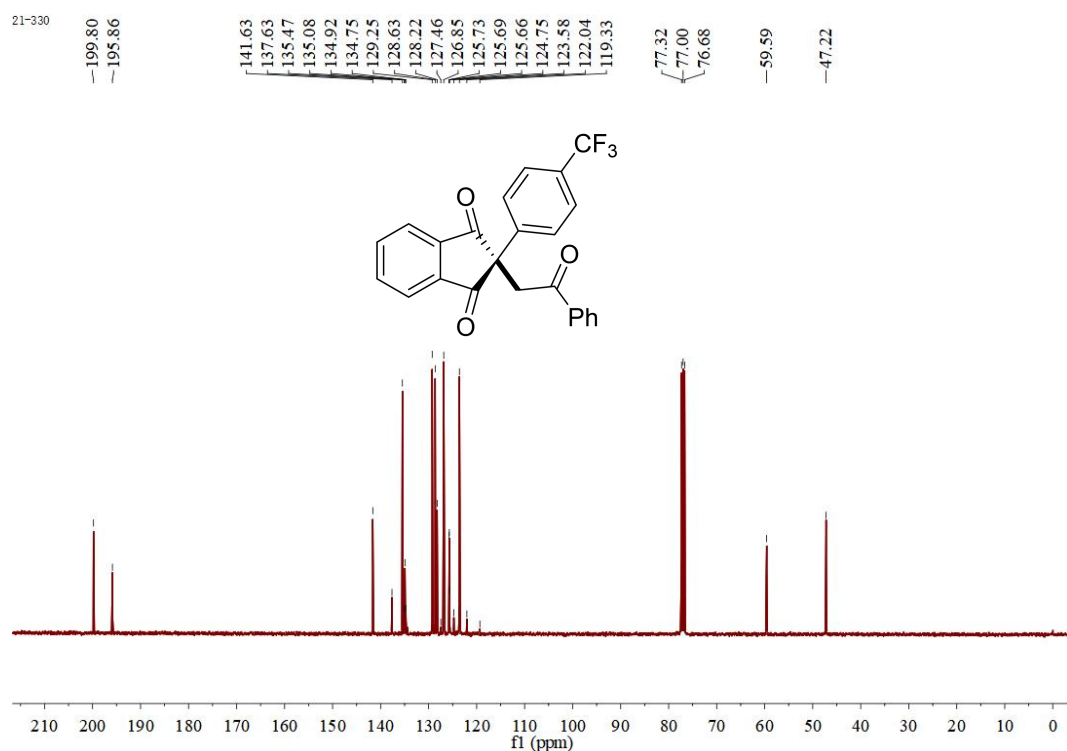

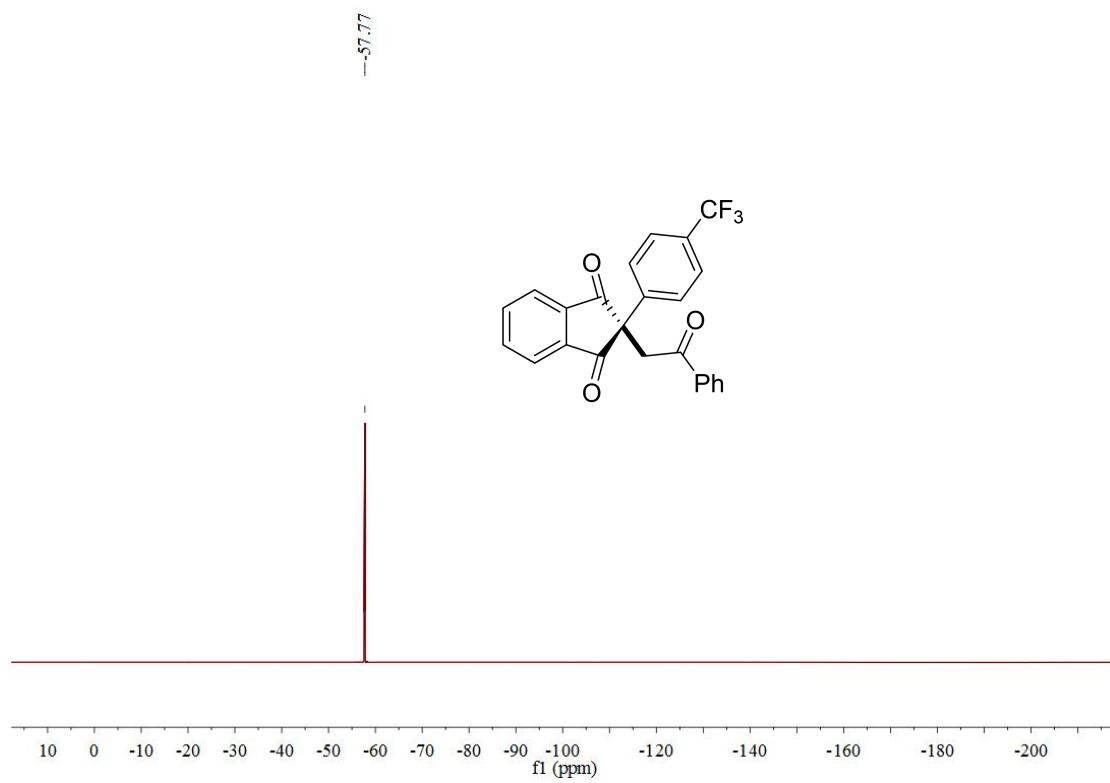



# <sup>1</sup>H NMR and <sup>13</sup>C NMR of 3m

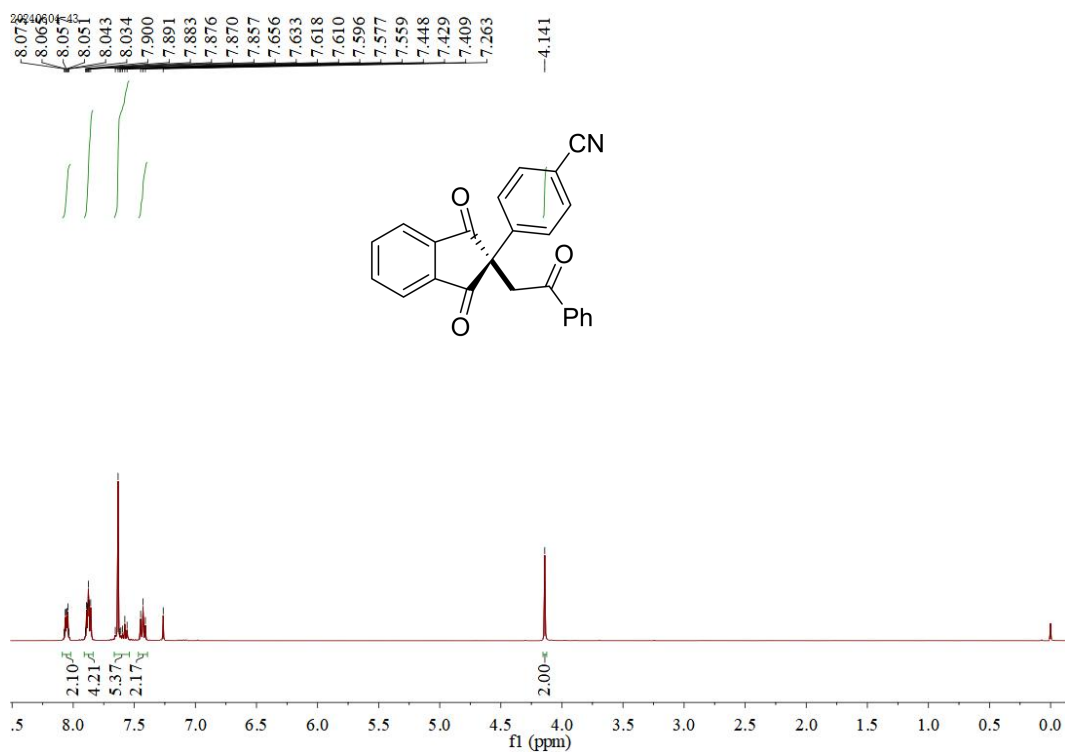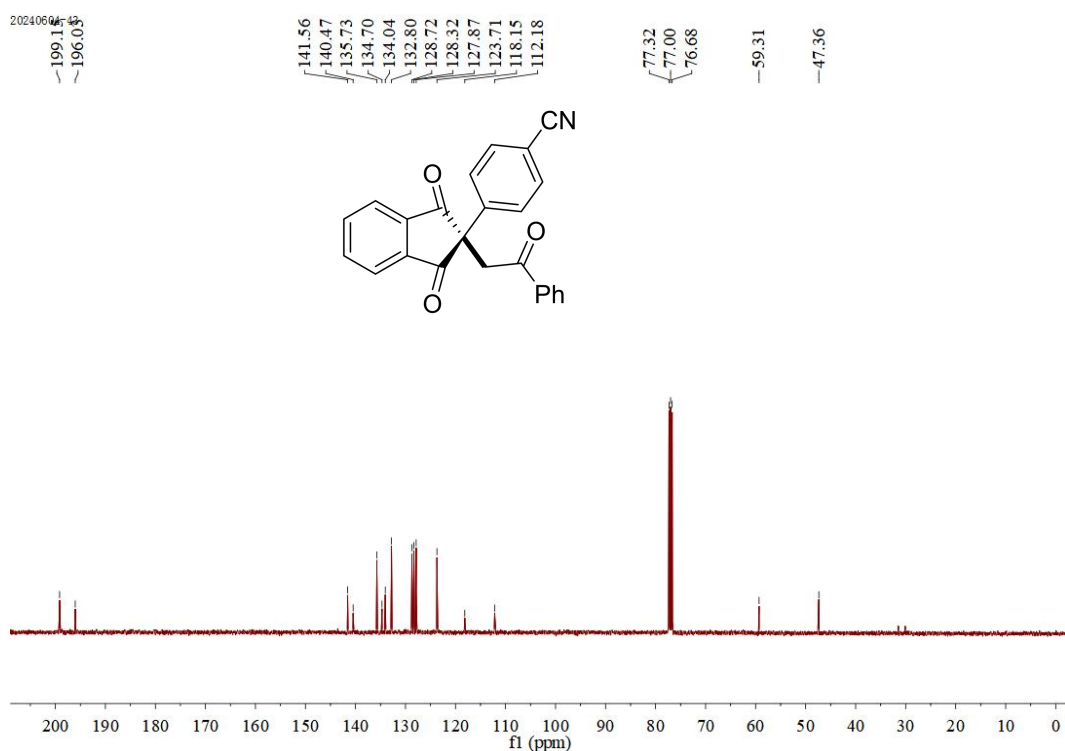

# <sup>1</sup>H NMR and <sup>13</sup>C NMR of 3n

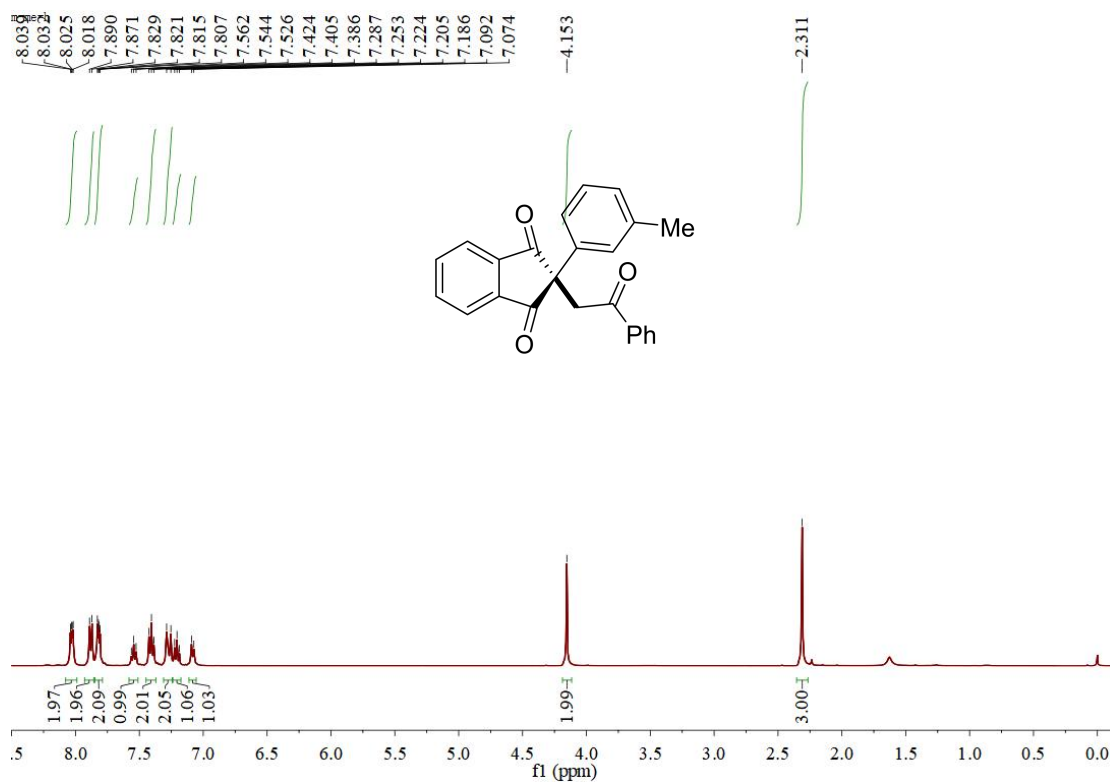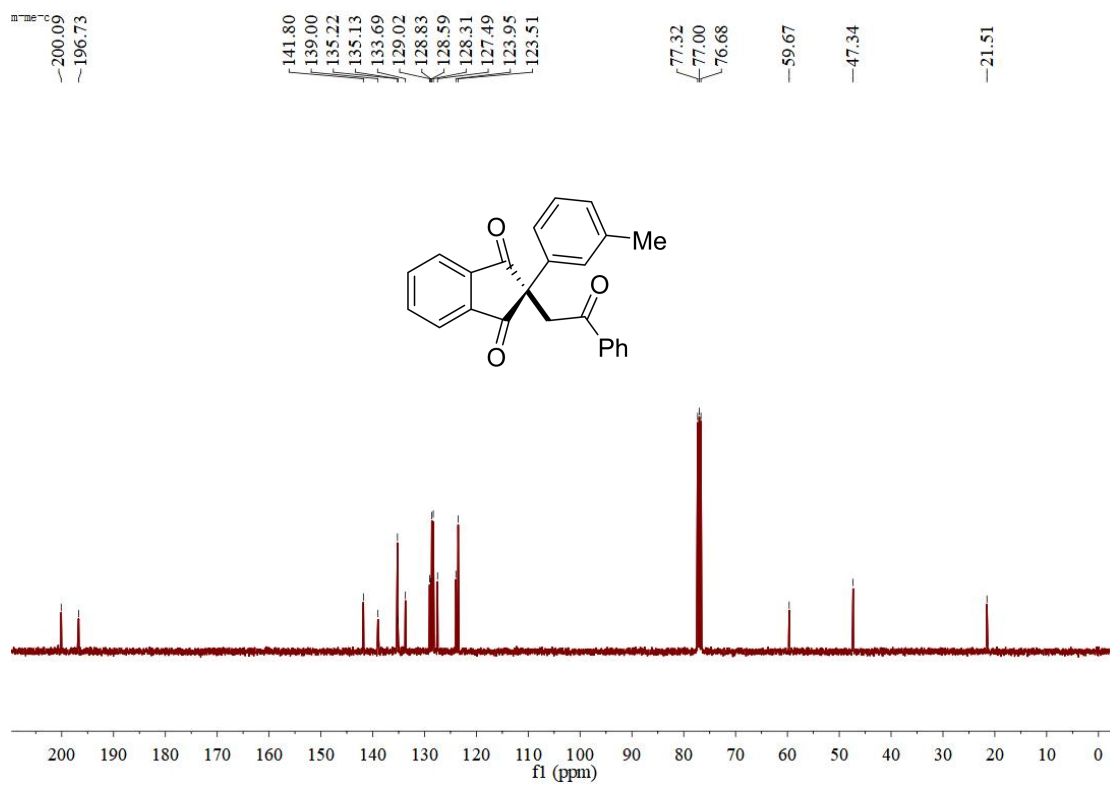

# <sup>1</sup>H NMR and <sup>13</sup>C NMR of 3o

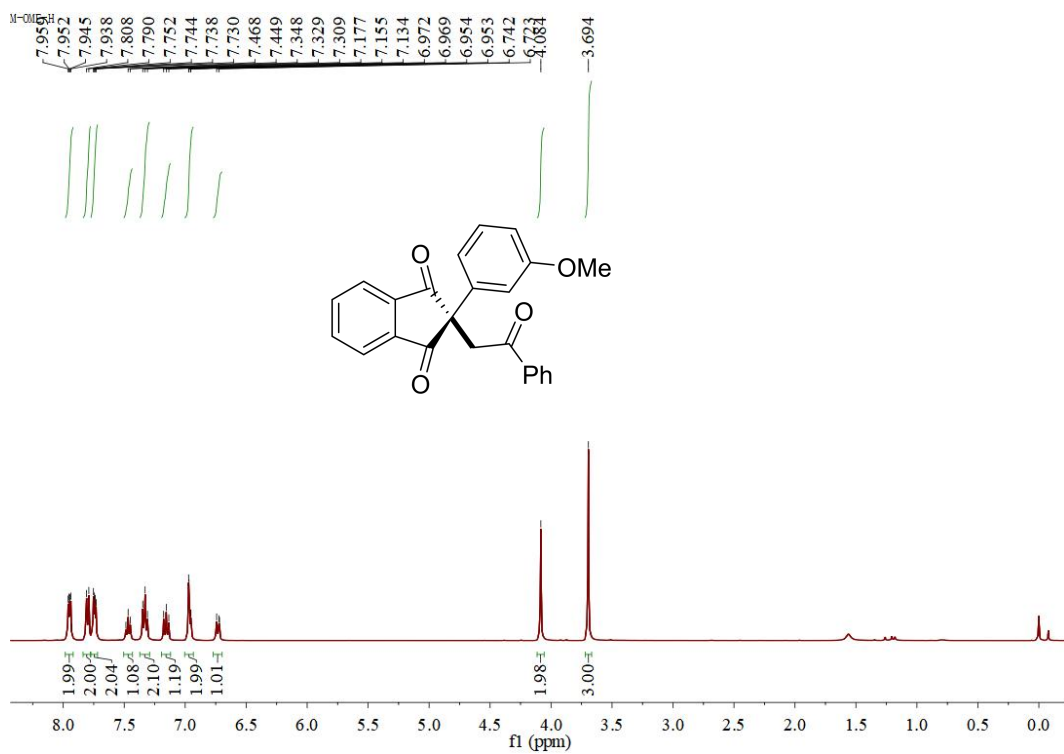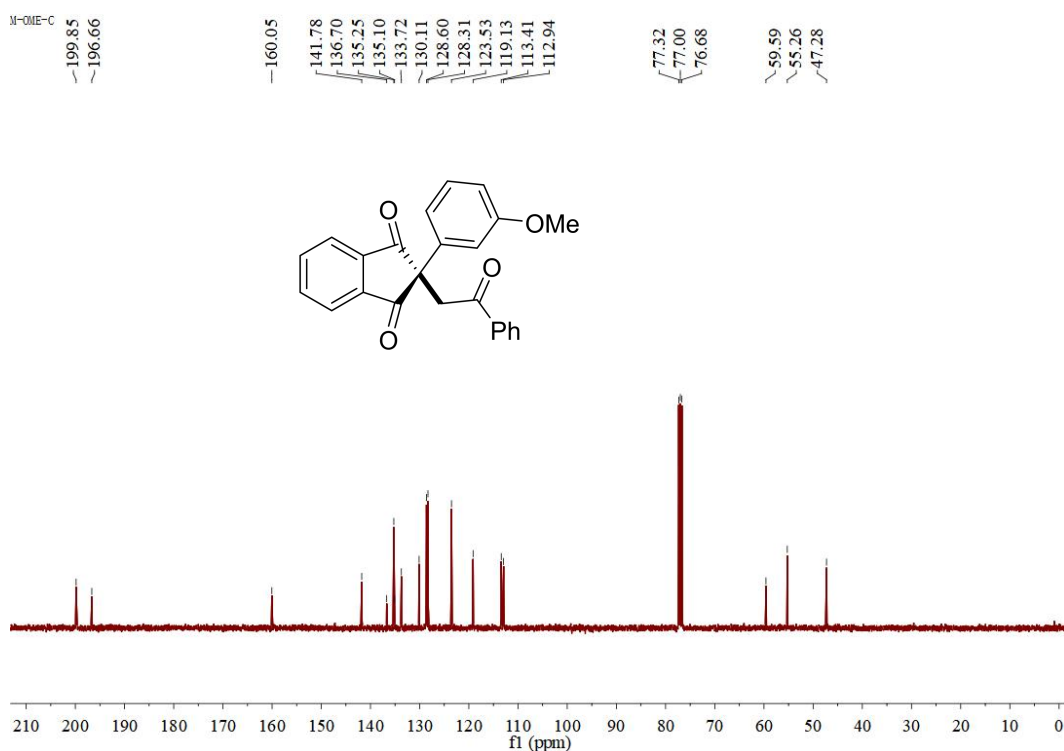

# <sup>1</sup>H NMR, <sup>13</sup>C NMR and <sup>19</sup>F NMR of 3p

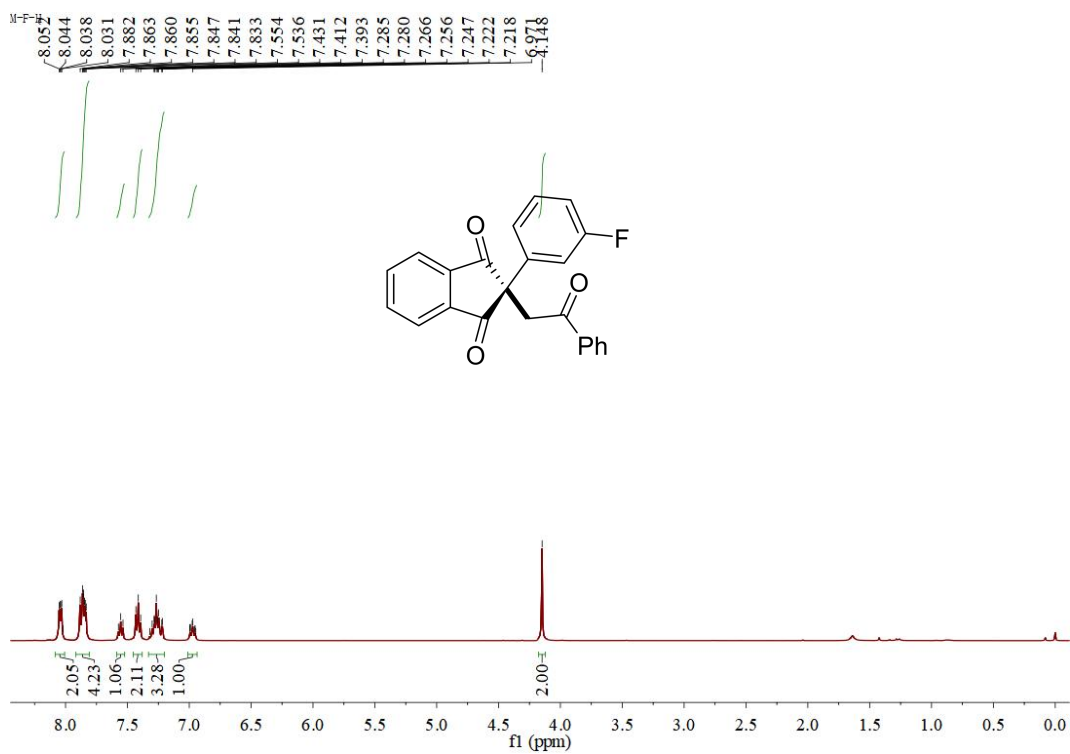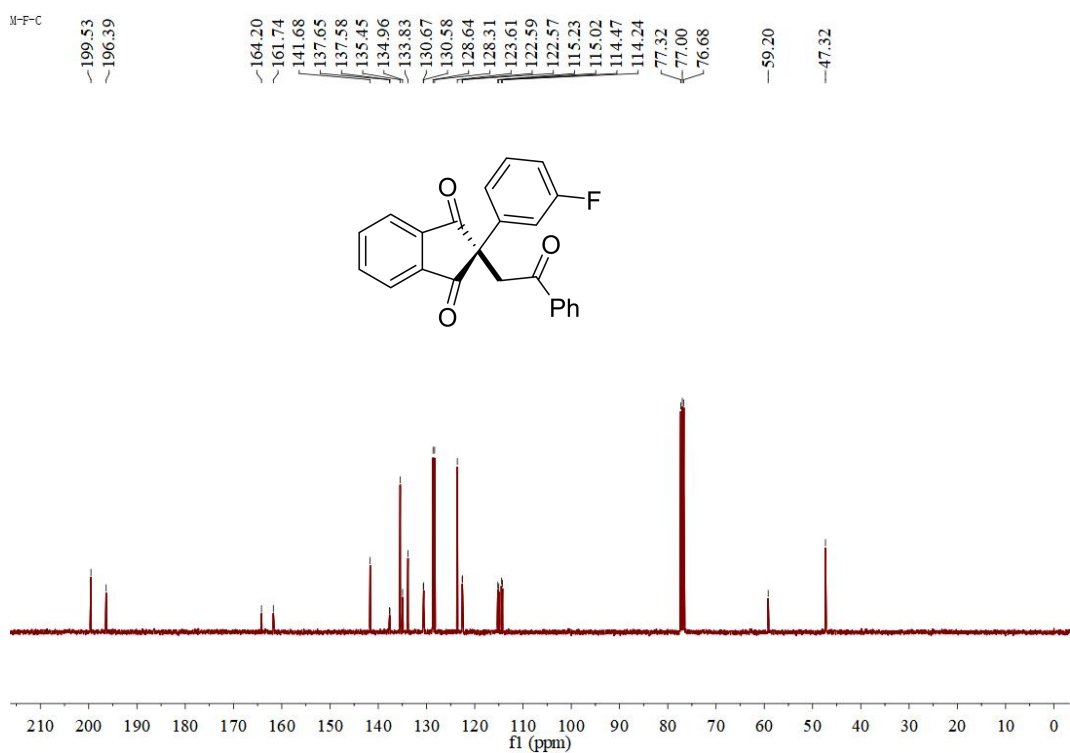

F201

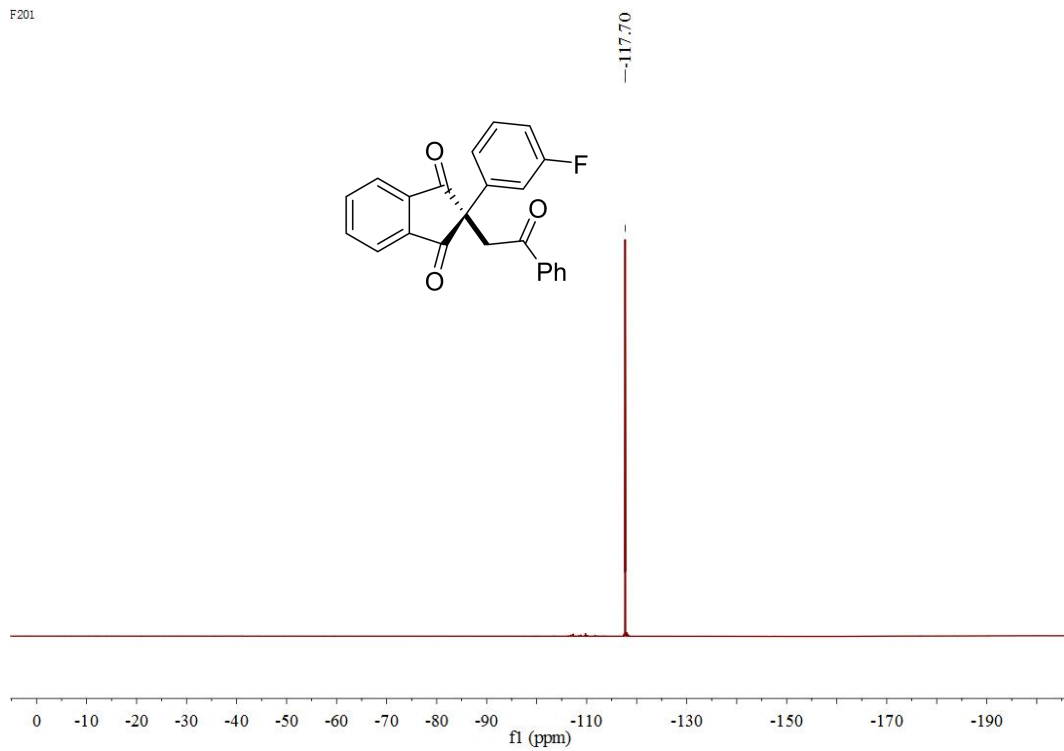

# <sup>1</sup>H NMR, <sup>13</sup>C NMR and <sup>19</sup>F NMR of 3q

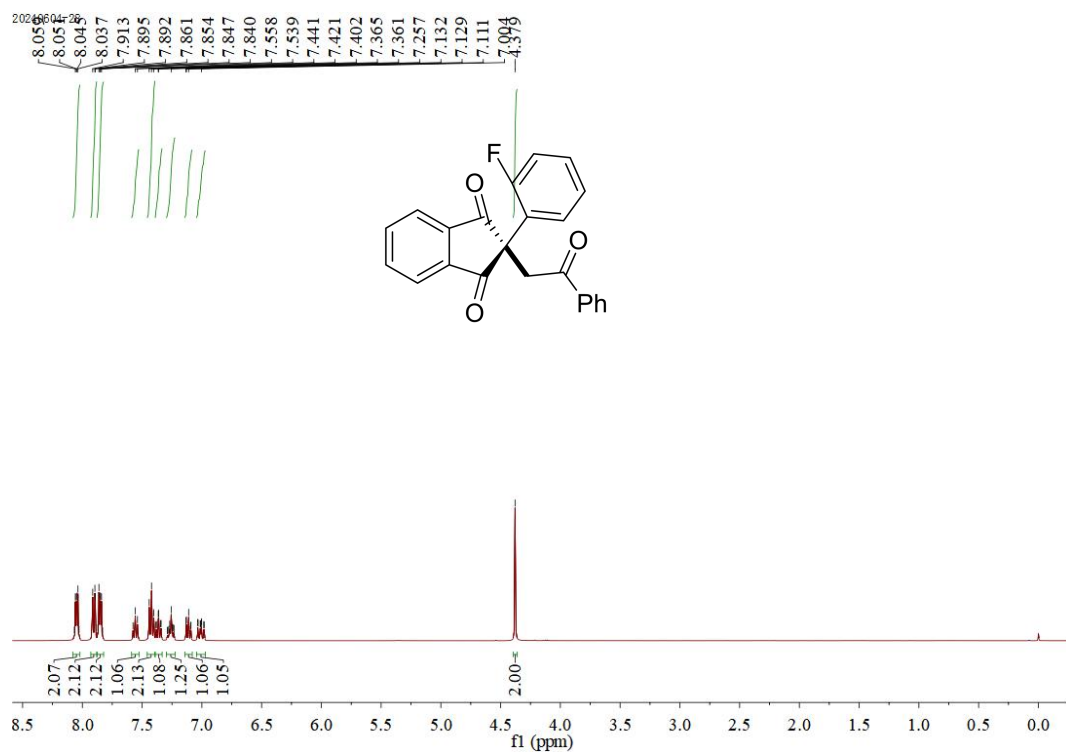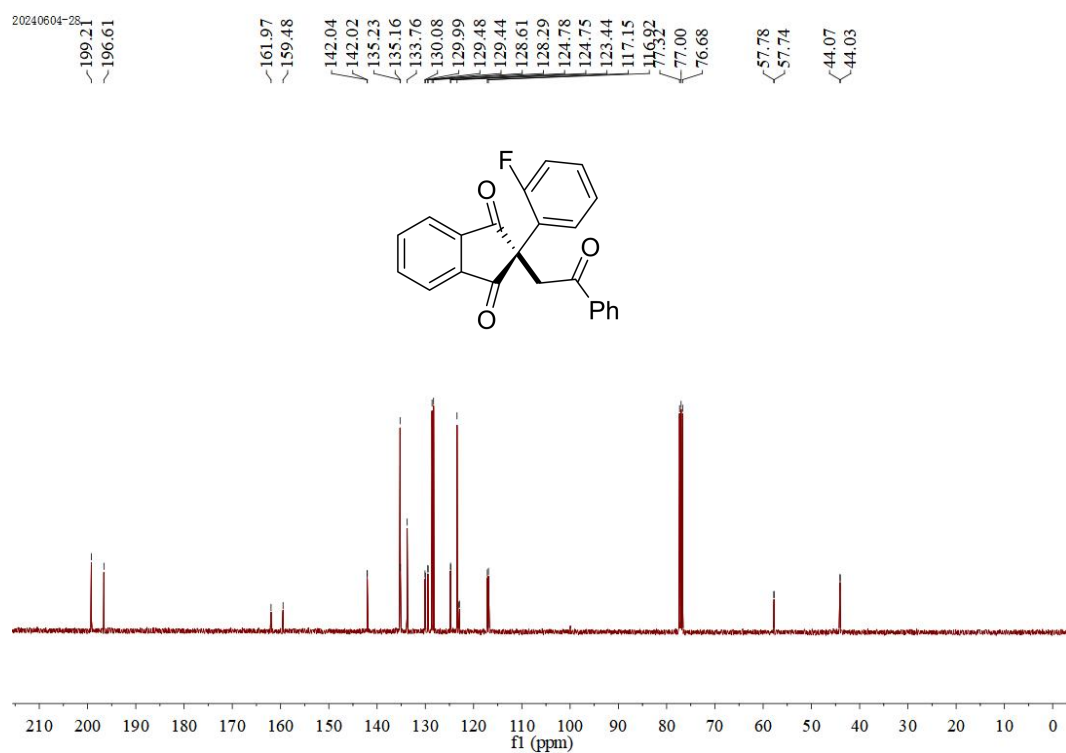

2024052328

---105.48

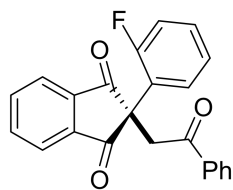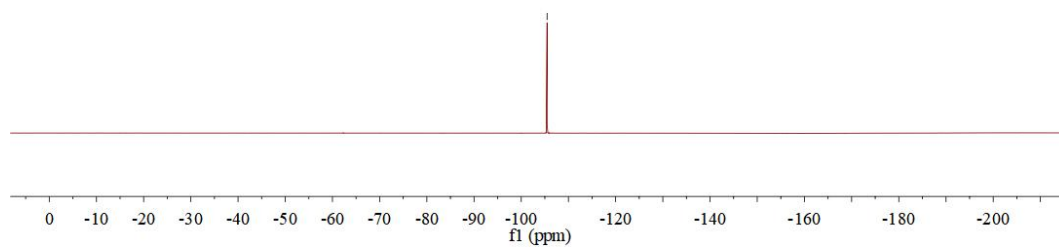

# <sup>1</sup>H NMR and <sup>13</sup>C NMR of 3r

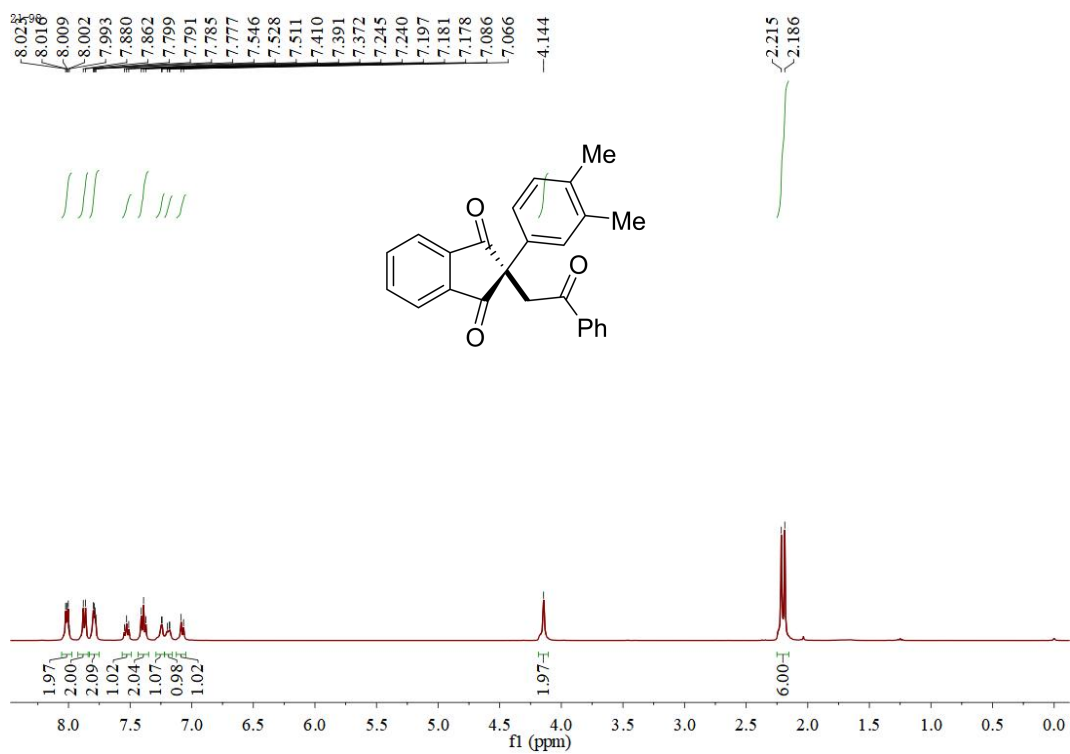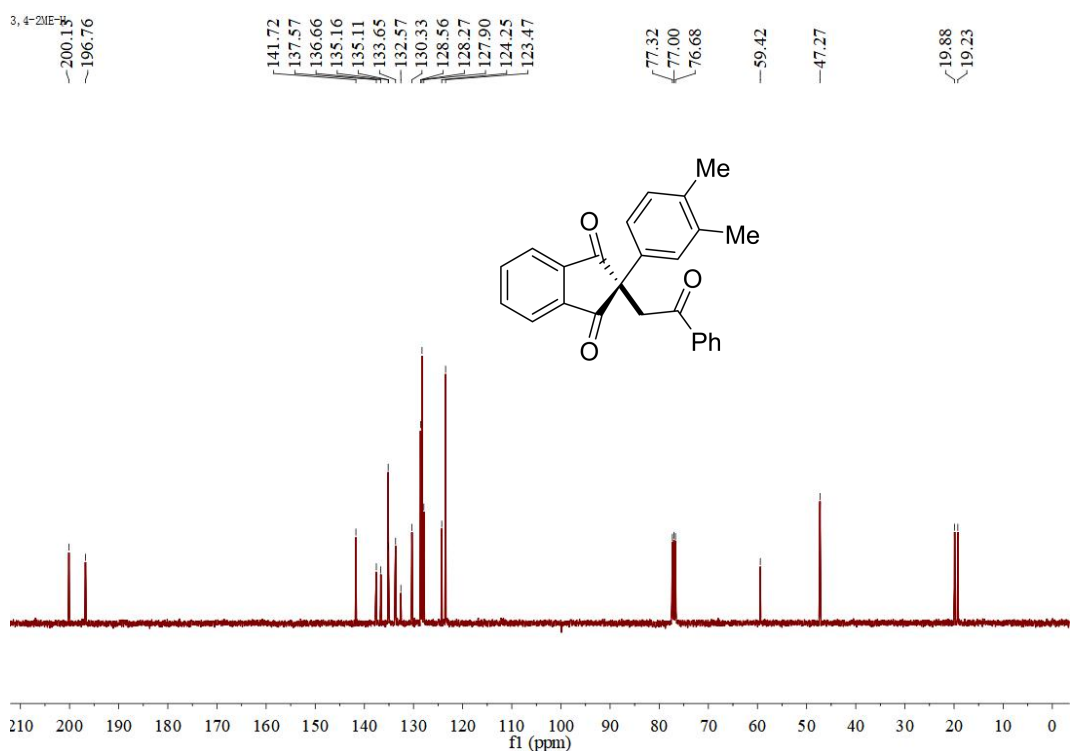



# <sup>1</sup>H NMR and <sup>13</sup>C NMR of 3s

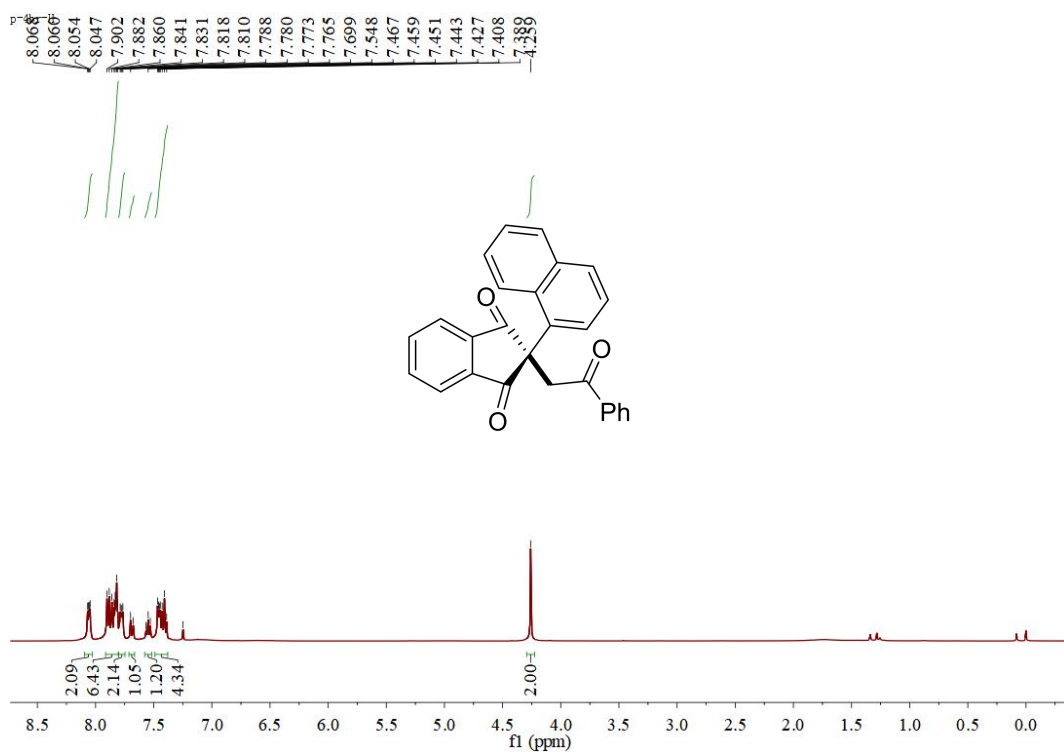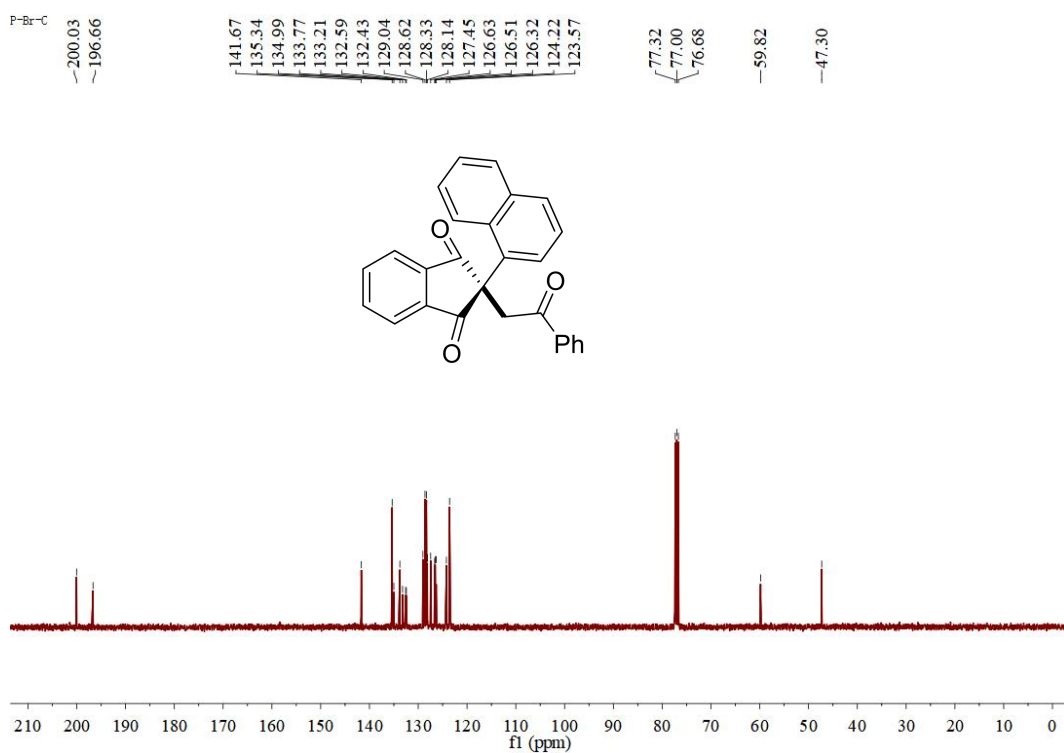

# <sup>1</sup>H NMR and <sup>13</sup>C NMR of 3t

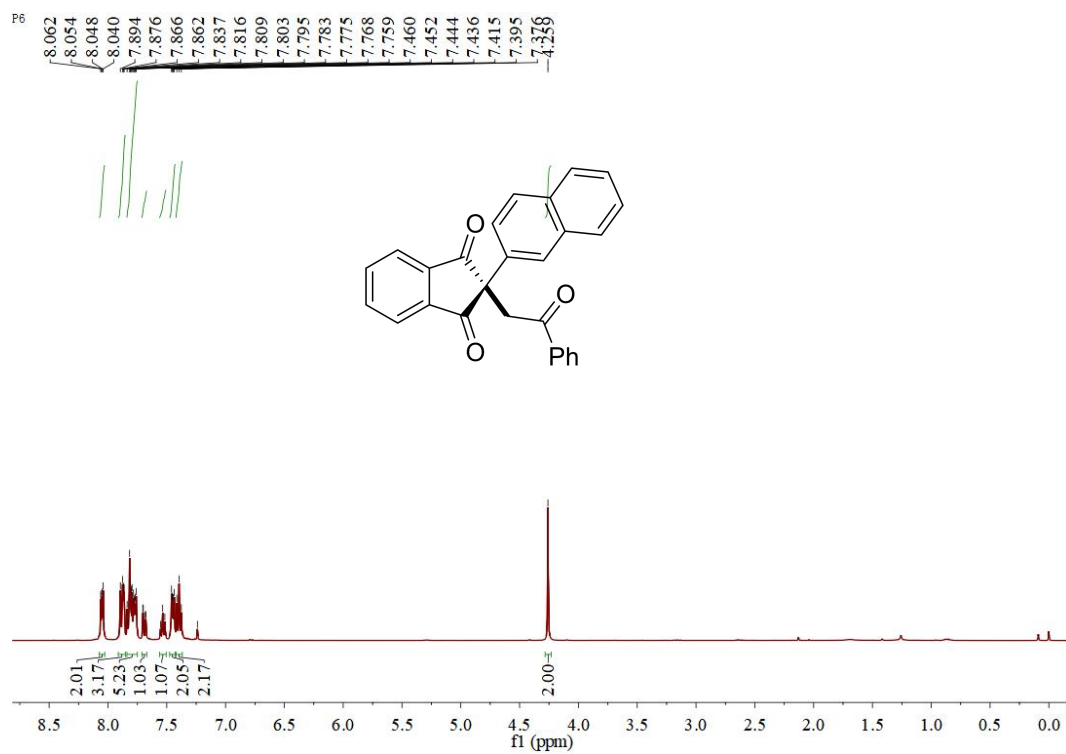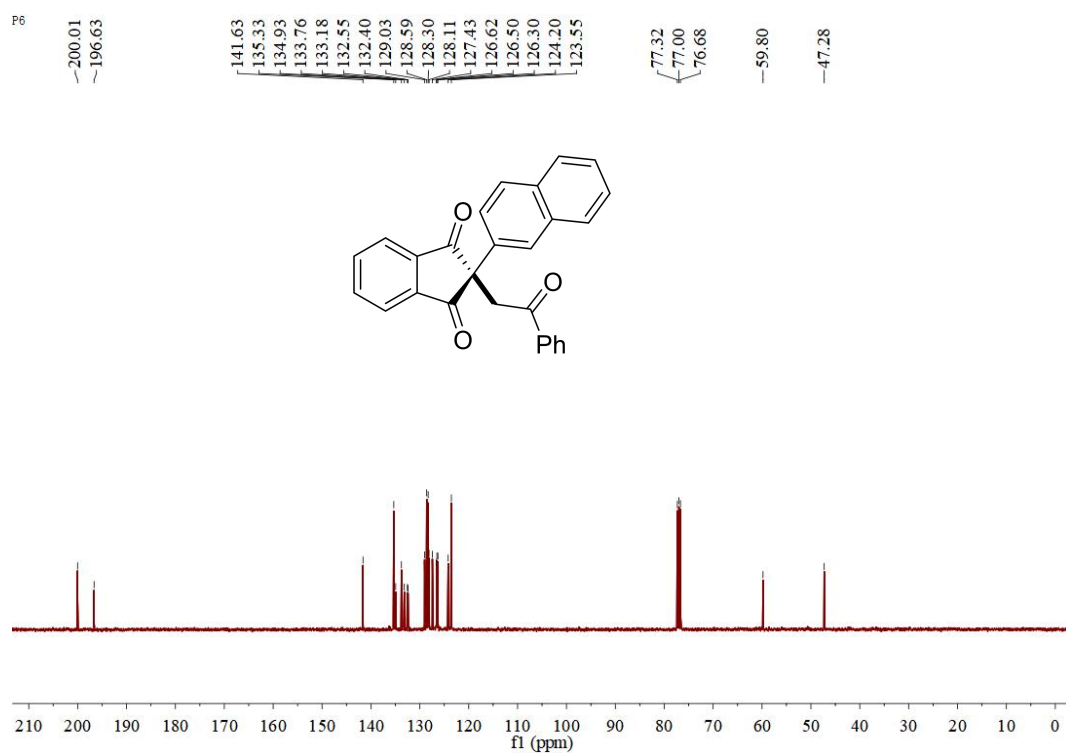

# $^1\text{H}$ NMR and $^{13}\text{C}$ NMR of 3u

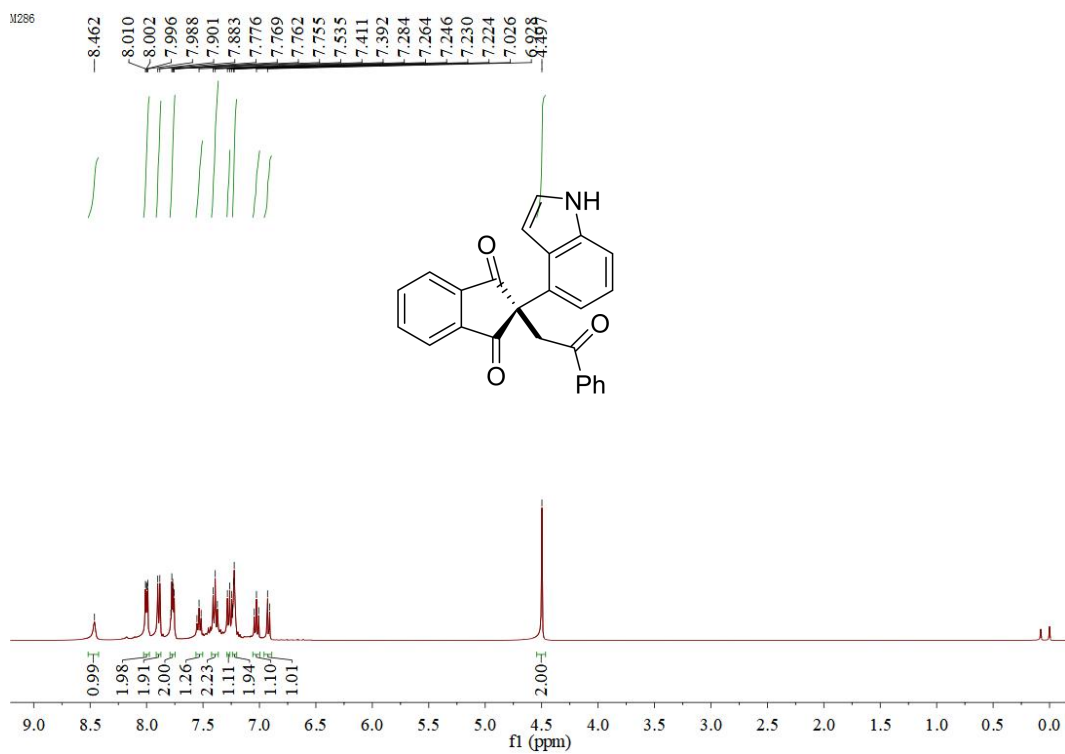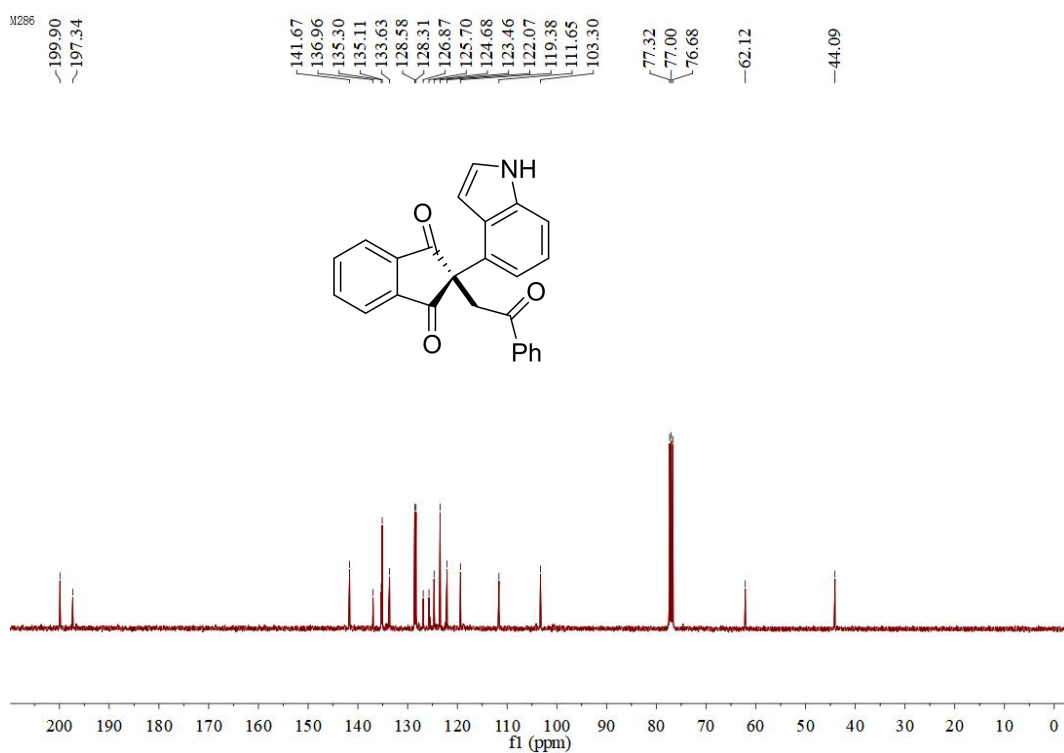

# <sup>1</sup>H NMR and <sup>13</sup>C NMR of 4v

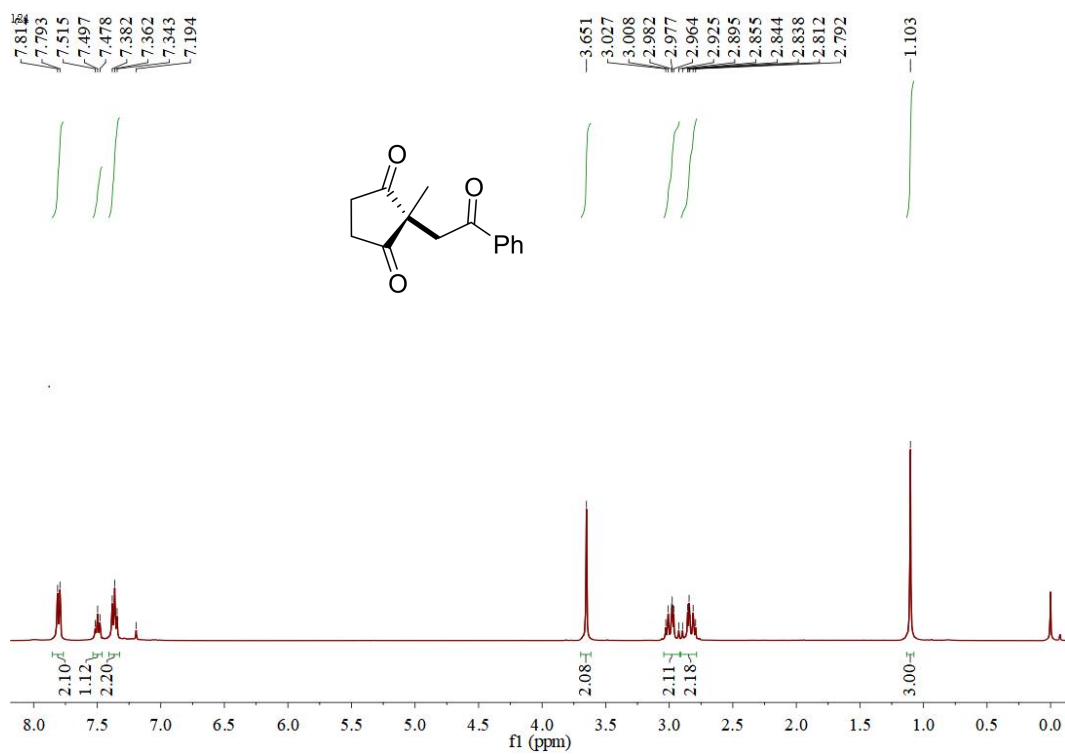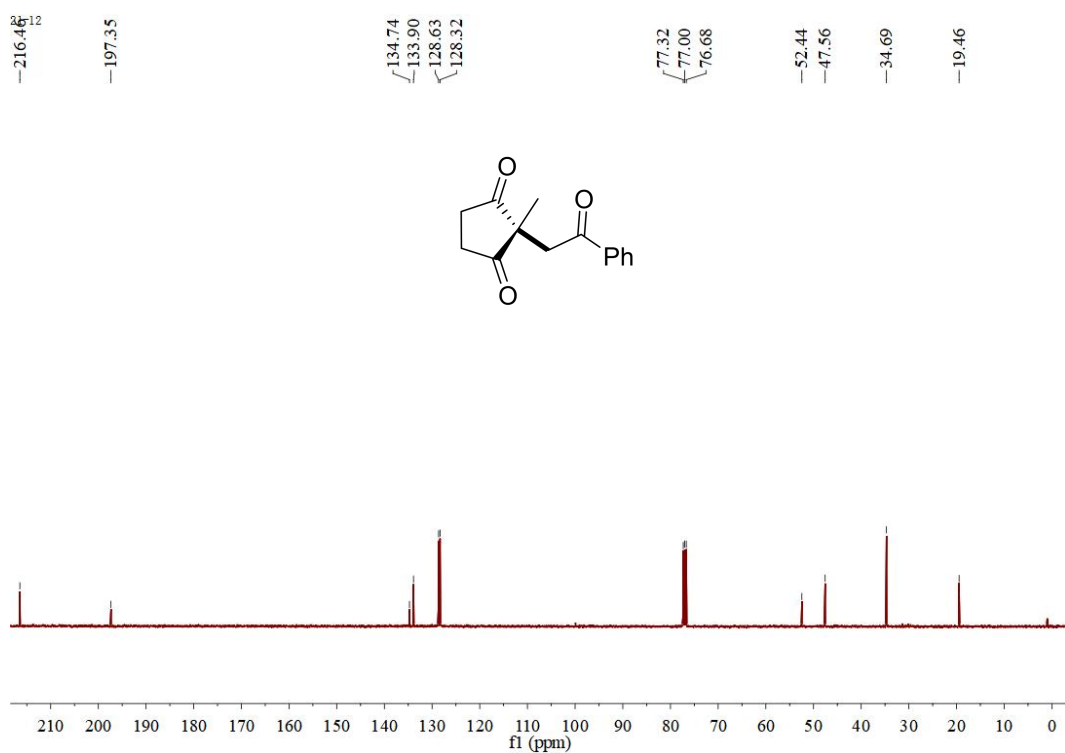

# <sup>1</sup>H NMR and <sup>13</sup>C NMR of 3w

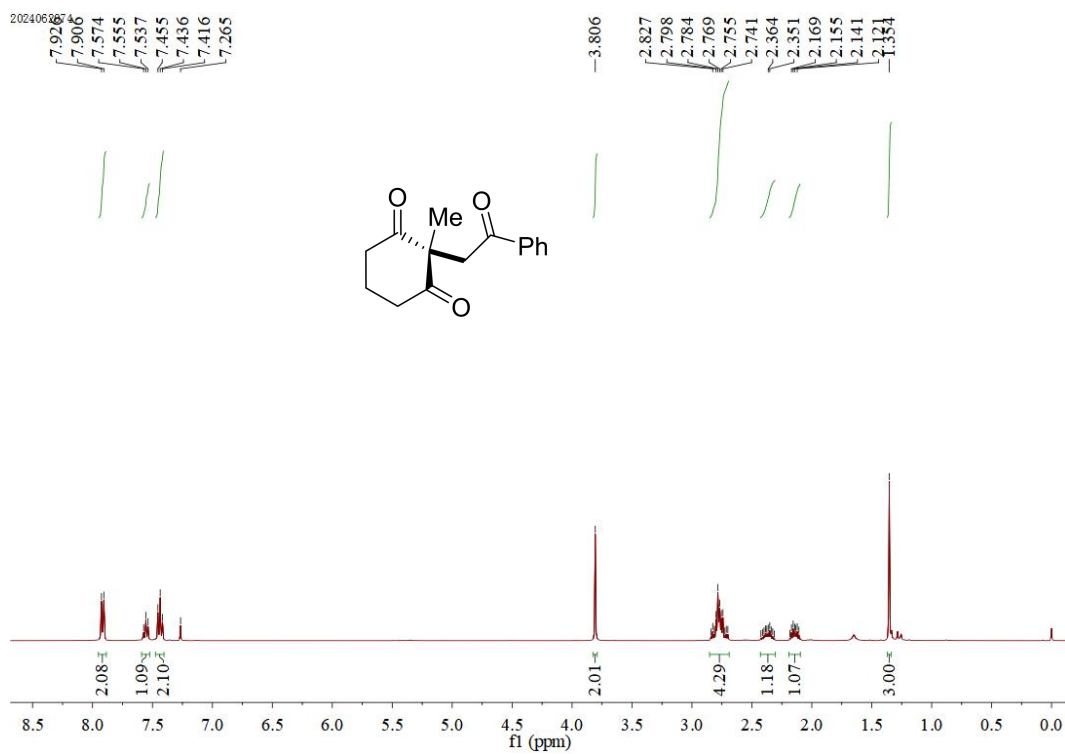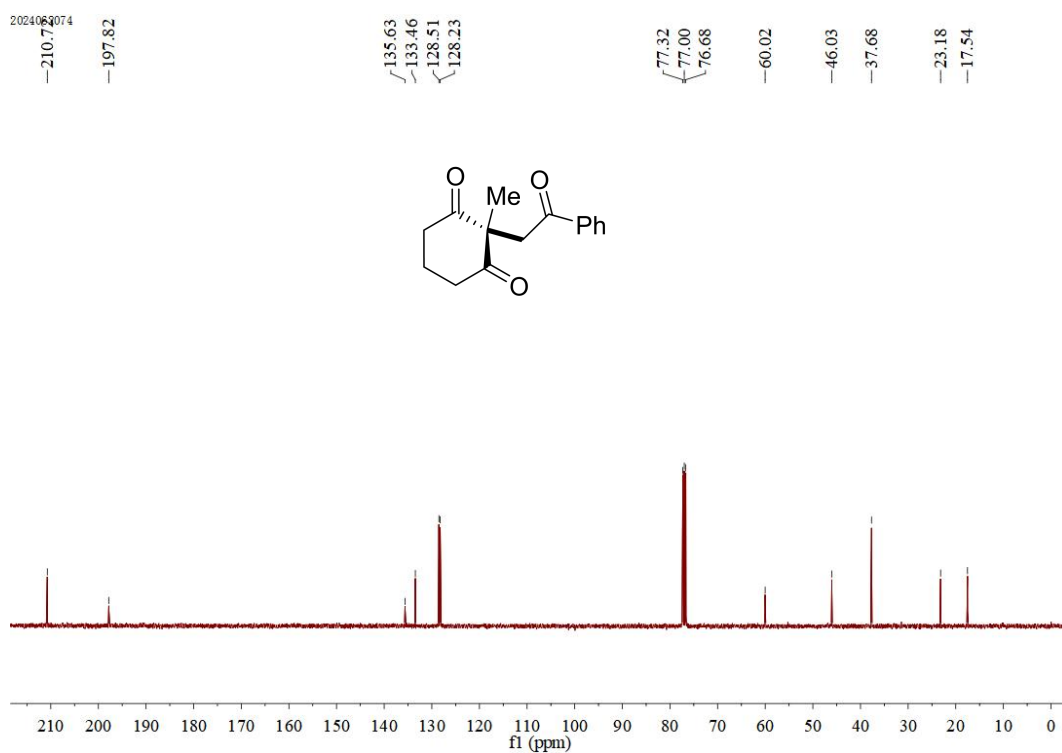

# <sup>1</sup>H NMR and <sup>13</sup>C NMR of 3x

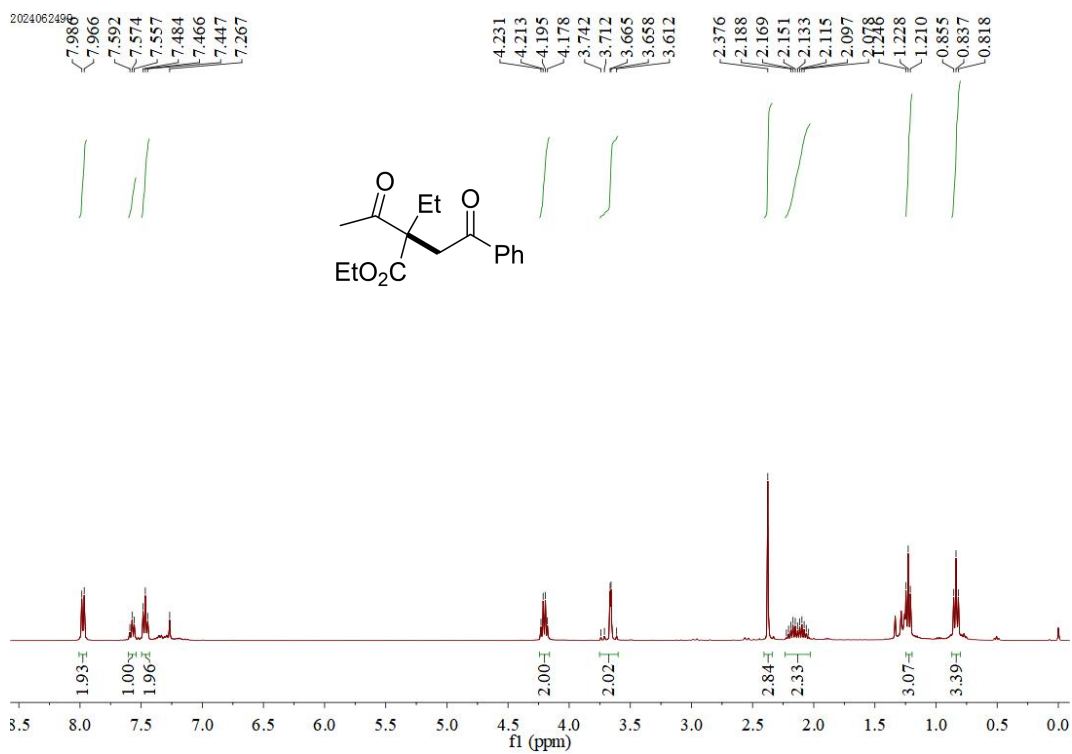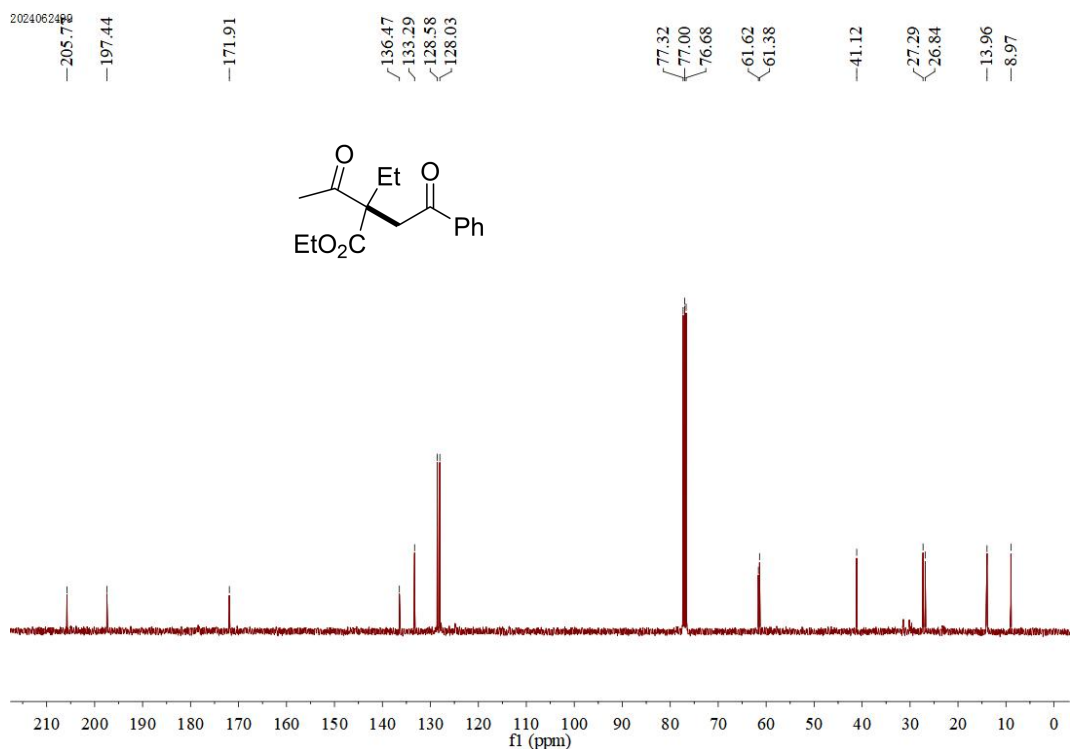

# <sup>1</sup>H NMR and <sup>13</sup>C NMR of 3y

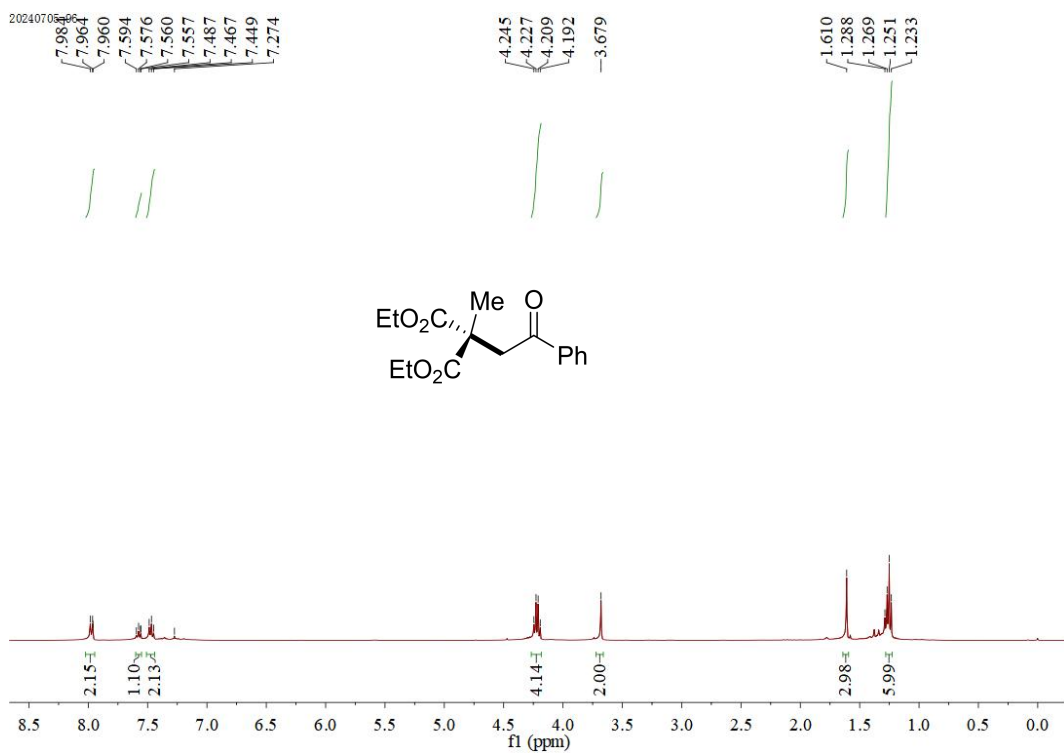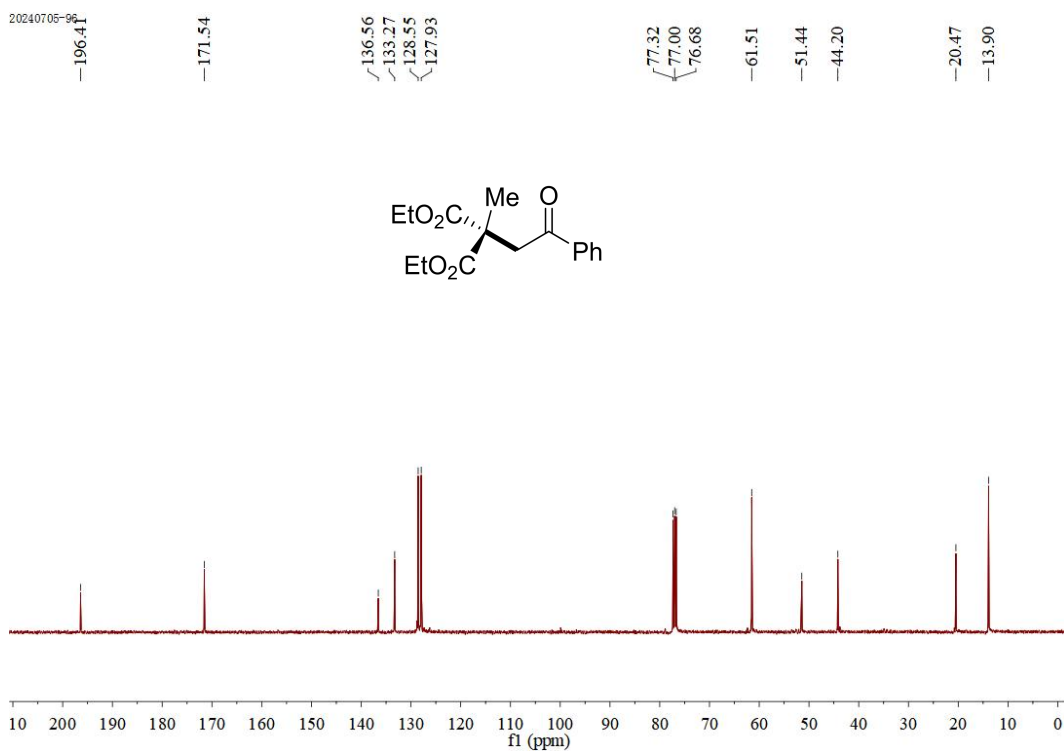

Supplement: d4cc03676j1.pdf [file d4cc03676j1.pdf]
